# Supplementary material for: Diagnosis of obstructive coronary artery disease using computed tomography angiography in patients with stable chest pain depending on clinical probability and in clinically important subgroups: meta-analysis of individual patient data
Source: PubMed Central journal article supplement (PMC6561308; doi:10.1136/bmj.l1945), 2019-06-12
Supplement: haar046861.ww2.pdf [file haar046861.ww2.pdf]

**Supplementary table 1 | Characteristics of studies included in this analysis.**

| Study characteristics and citation details |                 |                         |      |                                                                                                                                                                                                                            | Study data contribution |              |
|--------------------------------------------|-----------------|-------------------------|------|----------------------------------------------------------------------------------------------------------------------------------------------------------------------------------------------------------------------------|-------------------------|--------------|
| Study no.                                  | First author    | Journal                 | Year | Title                                                                                                                                                                                                                      | Pts. in data set*       | Data set no. |
| 1                                          | Leschka S       | Eur Heart J             | 2005 | Accuracy of MSCT coronary angiography with 64-slice technology: first experience                                                                                                                                           | 49                      | 1            |
| 2                                          | Alkadhi H       | Heart                   | 2010 | Low-dose, 128-slice, dual-source CT coronary angiography: accuracy and radiation dose of the high-pitch and the step-and-shoot mode                                                                                        | 99                      | 2            |
| 3                                          | Alkadhi H       | Eur Heart J             | 2008 | Dual-source computed tomography coronary angiography: influence of obesity, calcium load, and heart rate on diagnostic accuracy                                                                                            | 150                     | 3            |
| 4                                          | Leschka S       | AJR Am J Roentgenol     | 2008 | Effect of decrease in heart rate variability on the diagnostic accuracy of 64-MDCT coronary angiography                                                                                                                    | 80                      | 4            |
| 5                                          | Andreini D      | J Am Coll Cardiol       | 2007 | Diagnostic accuracy of multidetector computed tomography coronary angiography in patients with dilated cardiomyopathy                                                                                                      | 170                     | 5            |
| 6                                          | Andreini D      | Circ Cardiovasc Imaging | 2009 | Sixty-four-slice multidetector computed tomography: an accurate imaging modality for the evaluation of coronary arteries in dilated cardiomyopathy of unknown etiology                                                     | 127                     | 6            |
| 7                                          | Bettencourt N   | Circ Cardiovasc Imaging | 2009 | Multislice computed tomography in the exclusion of coronary artery disease in patients with presurgical valve disease                                                                                                      | 65                      | 7            |
| 8                                          | Dewey M         | Ann Intern Med          | 2006 | Noninvasive detection of coronary artery stenoses with multislice computed tomography or magnetic resonance imaging                                                                                                        | 129                     | 8            |
| 9                                          | Dewey M         | Circulation             | 2009 | Noninvasive coronary angiography by 320-row computed tomography with lower radiation exposure and maintained diagnostic accuracy: comparison of results with cardiac catheterization in a head-to-head pilot investigation | 29                      | 9            |
| 10                                         | Chow BJ         | Can J Cardiol           | 2007 | Comparison of computed tomographic angiography versus rubidium-82 positron emission tomography for the detection of patients with anatomical coronary artery disease                                                       | 26                      | 10           |
| 11                                         | Diederichsen AC | Scand Cardiovasc J      | 2009 | Diagnostic value of cardiac 64-slice computed tomography: importance of coronary calcium                                                                                                                                   | 99                      | 11           |

|    |                 |                         |      |                                                                                                                                                                                                                                                        |     |           |
|----|-----------------|-------------------------|------|--------------------------------------------------------------------------------------------------------------------------------------------------------------------------------------------------------------------------------------------------------|-----|-----------|
| 12 | Diederichsen AC | Unpublished study #1    |      |                                                                                                                                                                                                                                                        | 50  | <b>12</b> |
| 13 | Garcia MJ       | JAMA                    | 2006 | Accuracy of 16-row multidetector computed tomography for the assessment of coronary artery stenosis                                                                                                                                                    | 230 | <b>13</b> |
| 14 | Watkins MW      | Am J Cardiol            | 2007 | Detection of coronary artery stenosis using 40-channel computed tomography with multi-segment reconstruction                                                                                                                                           | 8   | <b>14</b> |
| 15 | Kefer J         | J Am Coll Cardiol       | 2005 | Head-to-head comparison of three-dimensional navigator-gated magnetic resonance imaging and 16-slice computed tomography to detect coronary artery stenosis in patients                                                                                | 41  | <b>15</b> |
| 16 | Pouleur AC      | Circ Cardiovasc Imaging | 2008 | Direct comparison of whole-heart navigator-gated magnetic resonance coronary angiography and 40- and 64-slice multidetector row computed tomography to detect the coronary artery stenosis in patients scheduled for conventional coronary angiography | 75  | <b>16</b> |
| 17 | Pouleur AC      | European Radiology      | 2007 | Usefulness of 40-slice multidetector row computed tomography to detect coronary disease in patients prior to cardiac valve surgery                                                                                                                     | 15  | <b>17</b> |
| 18 | Ghostine S      | J Am Coll Cardiol       | 2006 | Non-invasive detection of coronary artery disease in patients with left bundle branch block using 64-slice computed tomography                                                                                                                         | 32  | <b>18</b> |
| 19 | Halon DA        | Cardiology              | 2007 | Uses and limitations of 40 slice multi-detector row spiral computed tomography for diagnosing coronary lesions in unselected patients referred for routine invasive coronary angiography                                                               | 42  | <b>19</b> |
| 20 | Halvorsen BA    | Tidsskr Nor Laegeforen  | 2008 | Angiography with 64-channel CT upon suspicion of stable coronary disease                                                                                                                                                                               | 83  | <b>20</b> |
| 21 | Hamdan A        | JACC Cardiovasc Imaging | 2011 | A prospective study for comparison of MR and CT imaging for detection of coronary artery stenosis                                                                                                                                                      | 88  | <b>21</b> |
| 22 | Hausleiter J    | Eur Heart J             | 2007 | Non-invasive coronary computed tomographic angiography for patients with suspected coronary artery disease: the Coronary Angiography by Computed Tomography with the Use of a Submillimeter resolution (CACTUS) trial                                  | 243 | <b>22</b> |
| 23 | Jenkins SM      | QJM                     | 2011 | Limited clinical utility of CT coronary angiography in a district hospital setting                                                                                                                                                                     | 99  | <b>23</b> |

|    |                     |                                    |      |                                                                                                                                                                      |     |                                              |
|----|---------------------|------------------------------------|------|----------------------------------------------------------------------------------------------------------------------------------------------------------------------|-----|----------------------------------------------|
| 24 | Langer C            | J Comput Assist Tomogr             | 2009 | Noninvasive coronary angiography focusing on calcification: multislice computed tomography compared with magnetic resonance imaging                                  | 68  | <b>24</b>                                    |
| 25 | Martuscelli E       | Eur Heart J                        | 2004 | Accuracy of thin-slice computed tomography in the detection of coronary stenoses                                                                                     | 64  | <b>25</b>                                    |
| 26 | Meijboom WB         | Am J Cardiol                       | 2007 | Comparison of diagnostic accuracy of 64-slice computed tomography coronary angiography in women versus men with angina pectoris                                      | 178 | <b>26</b><br><br><b>and</b><br><br><b>27</b> |
| 27 | Meijboom WB         | Heart                              | 2007 | 64-Slice CT coronary angiography in patients with non-ST elevation acute coronary syndrome                                                                           |     |                                              |
| 28 | Meijboom WB         | J Am Coll Cardiol                  | 2006 | Pre-operative computed tomography coronary angiography to detect significant coronary artery disease in patients referred for cardiac valve surgery                  |     |                                              |
| 29 | Mollet NR           | Circulation                        | 2005 | High-resolution spiral computed tomography coronary angiography in patients referred for diagnostic conventional coronary angiography                                |     |                                              |
| 30 | Pugliese F          | Eur Radiol                         | 2006 | Diagnostic accuracy of non-invasive 64-slice CT coronary angiography in patients with stable angina pectoris                                                         |     |                                              |
| 31 | Meijboom WB         | J Am Coll Cardiol                  | 2008 | Diagnostic accuracy of 64-slice computed tomography coronary angiography: a prospective, multicenter, multivendor study                                              | 108 | <b>28</b>                                    |
| 32 | Mendoza-Rodriguez V | The Internet Journal of Cardiology | 2009 | Ischemic Heart Disease Diagnosed by 64 Slice Computed Tomography Coronary Angiography                                                                                | 81  | <b>29</b>                                    |
| 33 | Bonmassari R        | J Cardiovasc Med (Hagerstown)      | 2006 | Noninvasive detection of coronary artery stenosis with 16-slice spiral computed tomography in a population at low to moderate risk for coronary artery disease       | 33  | <b>30</b>                                    |
| 34 | Nikolaou K          | AJR Am J Roentgenol                | 2006 | Accuracy of 64-MDCT in the diagnosis of ischemic heart disease                                                                                                       | 60  | <b>31</b>                                    |
| 35 | Nikolaou K          | AJR Am J Roentgenol                | 2006 | Clinical value of MDCT in the diagnosis of coronary artery disease in patients with a low pretest likelihood of significant disease                                  | 33  | <b>32</b>                                    |
| 36 | Ovrehus KA          | Am J Cardiol                       | 2010 | Comparison of usefulness of exercise testing versus coronary computed tomographic angiography for evaluation of patients suspected of having coronary artery disease | 100 | <b>33</b>                                    |

|    |               |                      |      |                                                                                                                                                                                       |     |           |
|----|---------------|----------------------|------|---------------------------------------------------------------------------------------------------------------------------------------------------------------------------------------|-----|-----------|
| 37 | Ovrehus KA    | JCCT                 | 2010 | Coronary computed tomographic angiography in patients suspected of coronary artery disease: impact of observer experience on diagnostic performance and interobserver reproducibility | 110 | <b>34</b> |
| 38 | Pontone G     | Clin Radiol          | 2007 | Accuracy of multidetector spiral computed tomography in detecting significant coronary stenosis in patient populations with differing pre-test probabilities of disease               | 116 | <b>35</b> |
| 39 | Pontone G     | Coron Artery Dis     | 2007 | Diagnostic work-up of unselected patients with suspected coronary artery disease: complementary role of multidetector computed tomography, symptoms and electrocardiogram stress test | 144 | <b>36</b> |
| 40 | Pontone G     | J Am Coll Cardiol    | 2009 | Diagnostic accuracy of coronary computed tomography angiography: a comparison between prospective and retrospective electrocardiogram triggering                                      | 96  | <b>37</b> |
| 41 | Rixe J        | Circ J               | 2009 | Detection of relevant coronary artery disease using dual-source computed tomography in a high probability patient series: comparison with invasive angiography                        | 76  | <b>38</b> |
| 42 | Sato A        | J Nucl Cardiol       | 2010 | Incremental value of combining 64-slice computed tomography angiography with stress nuclear myocardial perfusion imaging to improve noninvasive detection of coronary artery disease  | 107 | <b>39</b> |
| 43 | Herzog C      | Radiology            | 2007 | Does two-segment image reconstruction at 64-section CT coronary angiography improve image quality and diagnostic accuracy?                                                            | 98  | <b>40</b> |
| 44 | Herzog C      | Radiology            | 2007 | Significant coronary artery stenosis: comparison on per-patient and per-vessel or per-segment basis at 64-section CT angiography                                                      |     |           |
| 45 | Arnoldi E     | Radiologe            | 2010 | Coronary CT angiography using prospective ECG triggering: high diagnostic accuracy with low radiation dose                                                                            | 20  | <b>41</b> |
| 46 | Shabestari AA | Am J Cardiol         | 2007 | Diagnostic performance of 64-channel multislice computed tomography in assessment of significant coronary artery disease in symptomatic subjects                                      | 113 | <b>42</b> |
| 47 | Ugolini P     | Can J Cardiol        | 2009 | Evaluation of coronary atheroma by 64-slice multidetector computed tomography: Comparison with intravascular ultrasound and angiography                                               | 13  | <b>43</b> |
| 48 | Ugolini P     | Unpublished study #2 |      |                                                                                                                                                                                       | 3   | <b>44</b> |

|    |            |                                  |      |                                                                                                                                                                                                                                                                                                 |     |           |
|----|------------|----------------------------------|------|-------------------------------------------------------------------------------------------------------------------------------------------------------------------------------------------------------------------------------------------------------------------------------------------------|-----|-----------|
| 49 | Yang L     | AJR Am J Roentgenol              | 2009 | 64-MDCT coronary angiography of patients with atrial fibrillation: influence of heart rate on image quality and efficacy in evaluation of coronary artery disease                                                                                                                               | 60  | <b>45</b> |
| 50 | Xu L       | Eur Radiol                       | 2011 | Diagnostic performance of 320-detector CT coronary angiography in patients with atrial fibrillation: preliminary results                                                                                                                                                                        | 37  | <b>46</b> |
| 51 | Sun K      | Chinese Medical Sciences Journal | 2012 | Feasibility and diagnostic accuracy for assessment of coronary artery stenosis of prospectively electrocardiogram-gated high-pitch spiral acquisition mode dual-source ct coronary angiography in patients with relatively higher heart rates: In comparison with catheter coronary angiography | 37  | <b>47</b> |
| 52 | Jakamy R   | Arch Cardiovasc Dis              | 2012 | Accuracy of multislice computed tomography in the preoperative assessment of coronary disease in patients scheduled for heart valve surgery                                                                                                                                                     | 32  | <b>48</b> |
| 53 | Kajander   | Circulation                      | 2010 | Cardiac positron emission tomography/computed tomography imaging accurately detects anatomically and functionally significant coronary artery disease                                                                                                                                           | 99  | <b>49</b> |
| 54 | Pontone G  | Am Heart J                       | 2011 | Feasibility and accuracy of a comprehensive multidetector computed tomography acquisition for patients referred for balloon-expandable transcatheter aortic valve implantation                                                                                                                  | 39  | <b>50</b> |
| 55 | Herzog BA  | Eur Heart J                      | 2008 | Accuracy of low-dose computed tomography coronary angiography using prospective electrocardiogram-triggering: first clinical experience                                                                                                                                                         | 22  | <b>51</b> |
| 56 | Herzog BA  | Heart                            | 2009 | First head-to-head comparison of effective radiation dose from low-dose 64-slice CT with prospective ECG-triggering versus invasive coronary angiography                                                                                                                                        | 36  | <b>52</b> |
| 57 | Husmann L  | Acad Radiol                      | 2010 | Usefulness of additional coronary calcium scoring in low-dose CT coronary angiography with prospective ECG-triggering impact on total effective radiation dose and diagnostic accuracy                                                                                                          | 61  | <b>53</b> |
| 58 | Andreini D | Cardiovasc Diabetol              | 2010 | Comparison of the diagnostic performance of 64-slice computed tomography coronary angiography in diabetic and non-diabetic patients with suspected coronary artery disease                                                                                                                      | 210 | <b>54</b> |

|    |             |                          |      |                                                                                                                                                                             |     |           |
|----|-------------|--------------------------|------|-----------------------------------------------------------------------------------------------------------------------------------------------------------------------------|-----|-----------|
| 59 | Chen CC     | Int J Cardiovasc Imaging | 2011 | The effect of calcium score on the diagnostic accuracy of coronary computed tomography angiography                                                                          | 75  | <b>55</b> |
| 60 | Laissy JP   | Heart                    | 2007 | Comprehensive evaluation of preoperative patients with aortic valve stenosis: usefulness of cardiac multidetector computed tomography                                       | 13  | <b>56</b> |
| 61 | Scheffel H  | Eur Radiol               | 2006 | Accuracy of dual-source CT coronary angiography: First experience in a high pre-test probability population without heart rate control                                      | 24  | <b>57</b> |
| 62 | Leschka S   | Heart                    | 2008 | Combining dual-source computed tomography coronary angiography and calcium scoring: added value for the assessment of coronary artery disease                               | 67  | <b>58</b> |
| 63 | Gueret P    | Am J Cardiol             | 2013 | Diagnostic Performance of Computed Tomography Coronary Angiography (from the Prospective National Multicenter Multivendor EVASCAN Study)                                    | 574 | <b>59</b> |
| 64 | Rochitte CE | Eur Heart J              | 2014 | Computed tomography angiography and perfusion to assess coronary artery stenosis causing perfusion defects by single photon emission computed tomography: the CORE320 study | 265 | <b>60</b> |
| 65 | Ghostine S  | Eur Heart J              | 2008 | Non-invasive diagnosis of ischaemic heart failure using 64-slice computed tomography                                                                                        | 31  | <b>61</b> |

Full study citations can be found in Supplementary table 18. Pts. = Number of patients \*=number of patients in the data set for main analysis. Number in the whole COME-CCT data set may be higher. The data set number will be used in supplementary 5 and 6 for identification.





Supplementary table 2 | QUADAS-2 analysis

| #  | Studies         |                                    | Risk of Bias      |            |                    |                 | Applicability Concerns |            |                    | Risk of Bias | Applicability Concerns |
|----|-----------------|------------------------------------|-------------------|------------|--------------------|-----------------|------------------------|------------|--------------------|--------------|------------------------|
|    | First author    | Journal, Year                      | Patient Selection | Index Test | Reference Standard | Flow and Timing | Patient Selection      | Index Test | Reference Standard | Total        | Total                  |
| 1  | Alkadhi H       | Eur Heart J 2008                   | Low               | Low        | Low                | Low             | Low                    | Low        | Low                | Low          | Low                    |
| 2  | Alkadhi H       | Heart 2010                         | Low               | Low        | Low                | Low             | Low                    | Low        | Low                | Low          | Low                    |
| 3  | Andreini D      | Cardiovasc Diabetol 2010           | Low               | Low        | Low                | Low             | Low                    | Low        | Low                | Low          | Low                    |
| 4  | Andreini D      | Circ Cardiovasc Imaging 2009       | Low               | Low        | Low                | Low             | Low                    | Low        | Low                | Low          | Low                    |
| 5  | Andreini D      | J Am Coll Cardiol 2007             | Low               | Low        | Low                | Low             | Low                    | Low        | Low                | Low          | Low                    |
| 6  | Arnoldi E       | Radiologe 2010                     | Low               | Unclear    | Low                | Unclear         | Low                    | Low        | Low                | Unclear      | Low                    |
| 7  | Bettencourt N   | Circ Cardiovasc Imaging 2009       | Low               | Low        | Low                | Low             | Low                    | Low        | Low                | Low          | Low                    |
| 8  | Bonmassari R    | J Cardiovasc Med (Hagerstown) 2006 | Low               | Unclear    | Unclear            | Unclear         | Low                    | Low        | Low                | Unclear      | Low                    |
| 9  | Chen CC         | Int J Cardiovasc Imaging 2011      | Low               | Low        | Unclear            | High            | Low                    | Low        | Low                | High         | Low                    |
| 10 | Chow BJ         | Can J Cardiol 2007                 | Unclear           | Unclear    | Unclear            | Low             | Low                    | Low        | Low                | Unclear      | Low                    |
| 11 | Dewey M         | Ann Intern Med 2006                | Low               | Low        | Low                | Low             | Low                    | Low        | Low                | Low          | Low                    |
| 12 | Dewey M         | Circulation 2009                   | Low               | Low        | Low                | Low             | Low                    | Low        | Low                | Low          | Low                    |
| 13 | Diederichsen AC | Scand Cardiovasc J 2009            | Low               | Low        | Low                | Low             | Low                    | Low        | Low                | Low          | Low                    |
| 14 | Garcia MJ       | JAMA 2006                          | High              | Low        | Unclear            | Low             | Low                    | Low        | Low                | High         | Low                    |
| 15 | Ghostine S      | J Am Coll Cardiol 2006             | Low               | Low        | Low                | Low             | Low                    | Low        | Low                | Low          | Low                    |

|    |               |                                 |      |         |         |         |     |     |     |     |         |     |
|----|---------------|---------------------------------|------|---------|---------|---------|-----|-----|-----|-----|---------|-----|
| 16 | Ghostine S    | Eur Heart 2008                  | Low  | Low     | Low     | Low     | Low | Low | Low | Low | Low     | Low |
| 17 | Gueret P      | Am J Cardiol 2013               | High | Low     | Low     | Low     | Low | Low | Low | Low | High    | Low |
| 18 | Halon DA      | Cardiology 2007                 | High | Low     | Low     | High    | Low | Low | Low | Low | High    | Low |
| 19 | Halvorsen BA  | Tidsskr Nor<br>Laegeforen 2008  | X    | X       | X       | X       | X   | X   | X   | X   | X       | X   |
| 20 | Hamdan A      | JACC Cardiovasc<br>Imaging 2011 | High | Low     | Low     | Low     | Low | Low | Low | Low | High    | Low |
| 21 | Hausleiter J  | Eur Heart J 2007                | Low  | Low     | Low     | Low     | Low | Low | Low | Low | Low     | Low |
| 22 | Herzog BA     | Eur Heart J 2008                | Low  | Unclear | Low     | Low     | Low | Low | Low | Low | Low     | Low |
| 23 | Herzog BA     | Heart 2009                      | Low  | Unclear | Low     | Low     | Low | Low | Low | Low | Low     | Low |
| 24 | Herzog C      | Radiology 2007*                 | Low  | Low     | Low     | Unclear | Low | Low | Low | Low | Unclear | Low |
| 25 | Herzog C      | Radiology 2007**                | Low  | Unclear | Low     | Low     | Low | Low | Low | Low | Unclear | Low |
| 26 | Husmann L     | Acad Radiol 2010                | High | Unclear | Low     | Unclear | Low | Low | Low | Low | High    | Low |
| 27 | Jakamy R      | Arch Cardiovasc Dis<br>2012     | Low  | Unclear | Low     | High    | Low | Low | Low | Low | High    | Low |
| 28 | Jenkins SM    | QJM 2012                        | Low  | Low     | Low     | High    | Low | Low | Low | Low | Low     | Low |
| 29 | Kajander      | Circulation 2010                | Low  | Low     | Low     | High    | Low | Low | Low | Low | High    | Low |
| 30 | Kefer J       | J Am Coll Cardiol<br>2005       | Low  | Low     | Low     | High    | Low | Low | Low | Low | Low     | Low |
| 31 | Laissy JP     | Heart 2007                      | Low  | Unclear | Unclear | Low     | Low | Low | Low | Low | Unclear | Low |
| 32 | Langer C      | J Comput Assist<br>Tomogr 2007  | Low  | Low     | Unclear | Low     | Low | Low | Low | Low | Unclear | Low |
| 33 | Leschka S     | Eur Heart 2005                  | High | Low     | Low     | Low     | Low | Low | Low | Low | High    | Low |
| 34 | Leschka S     | Heart 2008                      | Low  | Low     | Low     | Low     | Low | Low | Low | Low | Low     | Low |
| 35 | Leschka S     | AJR Am J Roentgenol<br>2008     | High | Low     | Low     | Low     | Low | Low | Low | Low | High    | Low |
| 36 | Martuscelli E | Eur Heart J 2004                | Low  | Low     | Unclear | High    | Low | Low | Low | Low | High    | Low |
| 37 | Meijboom WB   | J Am Coll Cardiol<br>2008       | Low  | Low     | Low     | Low     | Low | Low | Low | Low | Low     | Low |

|    |                     |                                         |      |         |         |         |     |     |     |         |     |     |
|----|---------------------|-----------------------------------------|------|---------|---------|---------|-----|-----|-----|---------|-----|-----|
| 38 | Meijboom WB         | J Am Coll Cardiol 2006                  | Low  | Low     | Low     | Low     | Low | Low | Low | Low     | Low | Low |
| 39 | Meijboom WB         | Heart 2007                              | Low  | Low     | Low     | Low     | Low | Low | Low | Low     | Low | Low |
| 40 | Meijboom WB         | Am J Cardiol 2007                       | Low  | Low     | Low     | Low     | Low | Low | Low | Low     | Low | Low |
| 41 | Mendoza-Rodriguez V | The Internet Journal of Cardiology 2007 | Low  | Unclear | Low     | Unclear | Low | Low | Low | Unclear | Low | Low |
| 42 | Mollet NR           | Circulation 2005                        | Low  | Low     | Low     | Low     | Low | Low | Low | Low     | Low | Low |
| 43 | Nikolaou K          | AJR Am J Roentgenol <sup>+</sup>        | High | Low     | Low     | High    | Low | Low | Low | High    | Low | Low |
| 44 | Nikolaou K          | AJR Am J Roentgenol <sup>++</sup>       | Low  | Low     | Low     | Low     | Low | Low | Low | Low     | Low | Low |
| 45 | Ovrehus KA          | Am J Cardiol 2010                       | Low  | Low     | Low     | Low     | Low | Low | Low | Low     | Low | Low |
| 46 | Ovrehus KA          | J Cardiovasc Comput Tomogr 2010         | Low  | Low     | Low     | Low     | Low | Low | Low | Low     | Low | Low |
| 47 | Pontone G           | Coron Art Dis 2007                      | High | Unclear | Low     | Unclear | Low | Low | Low | Unclear | Low | Low |
| 48 | Pontone G           | Am Heart J 2011                         | High | Unclear | Unclear | Unclear | Low | Low | Low | High    | Low | Low |
| 49 | Pontone G           | J Am Coll Cardiol 2009                  | High | Low     | Low     | Low     | Low | Low | Low | High    | Low | Low |
| 50 | Pontone G           | Clin Radiol 2007                        | Low  | Unclear | Low     | High    | Low | Low | Low | High    | Low | Low |
| 51 | Pouleur AC          | Eur Radiol 2007                         | Low  | Low     | Low     | Low     | Low | Low | Low | Low     | Low | Low |
| 52 | Pouleur AC          | Circ Cardiovasc Imaging 2008            | Low  | Low     | Low     | Low     | Low | Low | Low | Low     | Low | Low |
| 53 | Pugliese F          | Eur Radiol 2006                         | Low  | Low     | Low     | Low     | Low | Low | Low | Low     | Low | Low |
| 54 | Rixe J              | Circ J 2009                             | Low  | Unclear | Low     | Low     | Low | Low | Low | Unclear | Low | Low |
| 55 | Rochitte CE         | Eur Heart J 2014                        | High | Low     | Low     | Low     | Low | Low | Low | High    | Low | Low |
| 56 | Sato A              | J Nucl Cardiol 2010                     | Low  | Low     | Unclear | High    | Low | Low | Low | High    | Low | Low |
| 57 | Scheffel H          | Eur Radiol 2006                         | Low  | Unclear | Low     | High    | Low | Low | Low | High    | Low | Low |
| 58 | Shabestari AA       | Am J Cardiol 2007                       | High | Low     | Unclear | High    | Low | Low | Low | High    | Low | Low |
| 59 | Sun K               | Chin Med Sci J 2012                     | Low  | Low     | Low     | Unclear | Low | Low | Low | Unclear | Low | Low |
| 60 | Ugolini P           | Can J Cardiol 2009                      | Low  | Low     | Low     | Low     | Low | Low | Low | Low     | Low | Low |

|    |                  |                          |      |     |     |         |     |     |     |      |     |
|----|------------------|--------------------------|------|-----|-----|---------|-----|-----|-----|------|-----|
| 61 | Watkins MW       | Am J Cardiol 2007        | High | Low | Low | Unclear | Low | Low | Low | High | Low |
| 62 | Xu L             | Eur Radiol 2011          | Low  | Low | Low | Low     | Low | Low | Low | Low  | Low |
| 63 | Yang L           | AJR Am J Roentgenol 2009 | Low  | Low | Low | Low     | Low | Low | Low | Low  | Low |
| 64 | Unpublished data | Diederichsen AC          | X    | X   | X   | X       | X   | X   | X   | X    | X   |
| 65 | Unpublished data | Ugolini P                | X    | X   | X   | X       | X   | X   | X   | X    | X   |

\* refers to study 24 in supplementary table 1. \*\* refers to study 25 in supplementary table 1. + refers to study 43 in supplementary table 1. ++ refers to study 44 in supplementary table 1. X = QUADAS assessment not possible because of study language (Norwegian, #19) or unpublished data (#64 and #65).

Supplementary table 3 | QUADAS-2 risk of bias summary

| <b>Risk of bias</b> | <b>Patient selection</b> | <b>Index test</b> | <b>Reference standard</b> | <b>Flow and timing</b> | <b>Total</b> |
|---------------------|--------------------------|-------------------|---------------------------|------------------------|--------------|
| <b>Low</b>          | 47                       | 47                | 52                        | 41                     | 31           |
| <b>High</b>         | 14                       | 0                 | 0                         | 12                     | 20           |
| <b>Unclear</b>      | 1                        | 15                | 10                        | 9                      | 11           |

Supplementary table 4 | QUADAS-2 applicability concerns summary

| <b>Applicability concerns</b> | <b>Patient selection</b> | <b>Index test</b> | <b>Reference standard</b> | <b>Total</b> |
|-------------------------------|--------------------------|-------------------|---------------------------|--------------|
| <b>Low</b>                    | 62                       | 62                | 62                        | 62           |
| <b>High</b>                   | 0                        | 0                 | 0                         | 0            |
| <b>Unclear</b>                | 0                        | 0                 | 0                         | 0            |

Supplementary table 5 | Participant characteristics for each data set. Figures are numbers (percentages) unless stated otherwise.

| Data set* | Patients | Age mean (SD) | Male sex   | Chest pain symptoms |             |                |            | Risk factor distribution |           |            |                |                | Patients with CAD |
|-----------|----------|---------------|------------|---------------------|-------------|----------------|------------|--------------------------|-----------|------------|----------------|----------------|-------------------|
|           |          |               |            | Typical AP          | Atypical AP | Non-anginal CD | Other CD   | Arterial HTN             | DM        | HLD        | Active Smokers | Former Smokers |                   |
| 1         | 49       | 56 (13)       | 35 (71.4)  | 18 (36.7)           | 22 (44.9)   | 9 (18.4)       | 0 (0.0)    | 26 (53.1)                | 5 (10.2)  | 21 (42.9)  | 17 (34.7)      | 3 (6.1)        | 30 (61.2)         |
| 2         | 99       | 63 (8)        | 73 (73.7)  | 17 (17.2)           | 37 (37.4)   | 45 (45.5)      | 0 (0.0)    | 46 (46.5)                | 23 (23.2) | 35 (35.4)  | 38 (38.4)      | 31 (31.3)      | 35 (35.4)         |
| 3         | 150      | 64 (12)       | 103 (68.7) | 32 (21.3)           | 91 (60.7)   | 27 (18.0)      | 0 (0.0)    | 75 (50.0)                | 29 (19.3) | 57 (38.0)  | 62 (41.3)      | 7 (4.7)        | 59 (39.3)         |
| 4         | 80       | 61 (11)       | 46 (57.5)  | 12 (15.0)           | 32 (40.0)   | 27 (33.8)      | 9 (11.3)   | 41 (51.3)                | 12 (15.0) | 40 (50.0)  | 32 (40.0)      | 7 (8.8)        | 39 (48.8)         |
| 5         | 170      | 54 (8)        | 121 (71.2) | 0 (0.0)             | 20 (11.8)   | 19 (11.2)      | 131 (77.1) | 37 (21.8)                | 1 (0.6)   | 45 (26.5)  | 22 (12.9)      | 25 (14.7)      | 84 (49.4)         |
| 6         | 127      | 56 (7)        | 79 (62.2)  | 0 (0.0)             | 5 (3.9)     | 3 (2.4)        | 119 (93.7) | 49 (38.6)                | 14 (11.0) | 41 (32.3)  | 17 (13.4)      | 0 (0.0)        | 46 (36.2)         |
| 7         | 65       | 70 (8)        | 38 (58.5)  | 62 (95.4)           | 0 (0.0)     | 0 (0.0)        | 3 (4.6)    | 45 (69.2)                | 12 (18.5) | 33 (50.8)  | 5 (7.7)        | 8 (12.3)       | 22 (33.8)         |
| 8         | 129      | 63 (9)        | 34 (26.4)  | 61 (47.3)           | 32 (24.8)   | 13 (10.1)      | 23 (17.8)  | 93 (72.1)                | 21 (16.3) | 66 (51.2)  | 30 (23.3)      | 59 (45.7)      | 67 (51.9)         |
| 9         | 29       | 60 (10)       | 9 (31.0)   | 7 (24.1)            | 10 (34.5)   | 2 (6.9)        | 10 (34.5)  | 26 (89.7)                | 5 (17.2)  | 17 (58.6)  | 4 (13.8)       | 14 (48.3)      | 11 (37.9)         |
| 10        | 26       | 56 (9)        | 18 (69.2)  | 17 (65.4)           | 4 (15.4)    | 1 (3.8)        | 4 (15.4)   | 15 (57.7)                | 4 (15.4)  | 19 (73.1)  | 4 (15.4)       | 16 (61.5)      | 19 (73.1)         |
| 11        | 99       | 62 (11)       | 53 (53.5)  | 77 (77.8)           | 0 (0.0)     | 0 (0.0)        | 22 (22.2)  | 49 (49.5)                | 9 (9.1)   | 43 (43.4)  | 25 (25.3)      | 32 (32.3)      | 31 (31.3)         |
| 12        | 50       | 62 (10)       | 26 (52.0)  | 13 (26.0)           | 19 (38.0)   | 18 (36.0)      | 0 (0.0)    | 30 (60.0)                | 3 (6.0)   | 18 (36.0)  | 13 (26.0)      | 24 (48.0)      | 20 (40.0)         |
| 13        | 230      | 60 (9)        | 156 (67.8) | 134 (58.3)          | 59 (25.7)   | 37 (16.1)      | 0 (0.0)    | 102 (44.3)               | 14 (6.1)  | 98 (42.6)  | 47 (20.4)      | 100 (43.5)     | 72 (31.3)         |
| 14        | 8        | 61 (10)       | 6 (75.0)   | 5 (62.5)            | 3 (37.5)    | 0 (0.0)        | 0 (0.0)    | 6 (75.0)                 | 0 (0.0)   | 7 (87.5)   | 0 (0.0)        | 0 (0.0)        | 3 (37.5)          |
| 15        | 41       | 64 (13)       | 32 (78.0)  | 21 (51.2)           | 4 (9.8)     | 5 (12.2)       | 11 (26.8)  | 23 (56.1)                | 5 (12.2)  | 20 (48.8)  | 15 (36.6)      | 4 (9.8)        | 24 (58.5)         |
| 16        | 75       | 60 (13)       | 56 (74.7)  | 12 (16.0)           | 4 (5.3)     | 5 (6.7)        | 54 (72.0)  | 40 (53.3)                | 13 (17.3) | 45 (60.0)  | 23 (30.7)      | 10 (13.3)      | 17 (22.7)         |
| 17        | 15       | 62 (12)       | 9 (60.0)   | 3 (20.0)            | 0 (0.0)     | 0 (0.0)        | 12 (80.0)  | 8 (53.3)                 | 0 (0.0)   | 4 (26.7)   | 4 (26.7)       | 0 (0.0)        | 5 (33.3)          |
| 18        | 32       | 70 (13)       | 15 (46.9)  | 20 (62.5)           | 12 (37.5)   | 0 (0.0)        | 0 (0.0)    | 23 (71.9)                | 10 (31.3) | 19 (59.4)  | 13 (40.6)      | 0 (0.0)        | 15 (46.9)         |
| 19        | 42       | 56 (12)       | 35 (83.3)  | 0 (0.0)             | 0 (0.0)     | 0 (0.0)        | 42 (100.0) | 18 (42.9)                | 8 (19.0)  | 0 (0.0)    | 11 (26.2)      | 9 (21.4)       | 22 (52.4)         |
| 20        | 83       | 61 (9)        | 46 (55.4)  | 46 (55.4)           | 35 (42.2)   | 0 (0.0)        | 2 (2.4)    | 42 (50.6)                | 12 (14.5) | 53 (63.9)  | 15 (18.1)      | 34 (41.0)      | 39 (47.0)         |
| 21        | 88       | 64 (9)        | 56 (63.6)  | 25 (28.4)           | 28 (31.8)   | 17 (19.3)      | 18 (20.5)  | 62 (70.5)                | 20 (22.7) | 53 (60.2)  | 16 (18.2)      | 40 (45.5)      | 44 (50.0)         |
| 22        | 243      | 62 (10)       | 158 (65.0) | 38 (15.6)           | 136 (56.0)  | 0 (0.0)        | 69 (28.4)  | 0 (0.0)                  | 0 (0.0)   | 152 (62.6) | 38 (15.6)      | 46 (18.9)      | 101 (41.6)        |
| 23        | 99       | 58 (11)       | 55 (55.6)  | 55 (55.6)           | 0 (0.0)     | 38 (38.4)      | 6 (6.1)    | 53 (53.5)                | 11 (11.1) | 87 (87.9)  | 24 (24.2)      | 32 (32.3)      | 38 (38.4)         |
| 24        | 68       | 64 (11)       | 38 (55.9)  | 0 (0.0)             | 68 (100.0)  | 0 (0.0)        | 0 (0.0)    | 57 (83.8)                | 11 (16.2) | 51 (75.0)  | 7 (10.3)       | 22 (32.4)      | 26 (38.2)         |

|    |     |         |            |            |           |           |           |           |           |            |           |           |           |
|----|-----|---------|------------|------------|-----------|-----------|-----------|-----------|-----------|------------|-----------|-----------|-----------|
| 25 | 64  | 59 (7)  | 59 (92.2)  | 33 (51.6)  | 16 (25.0) | 2 (3.1)   | 13 (20.3) | 61 (95.3) | 37 (57.8) | 52 (81.3)  | 24 (37.5) | 24 (37.5) | 43 (67.2) |
| 26 | 38  | 60 (12) | 33 (86.8)  | 18 (47.4)  | 11 (28.9) | 9 (23.7)  | 0 (0.0)   | 20 (52.6) | 7 (18.4)  | 21 (55.3)  | 10 (26.3) | 0 (0.0)   | 21 (55.3) |
| 27 | 140 | 60 (11) | 95 (67.9)  | 58 (41.4)  | 35 (25.0) | 47 (33.6) | 0 (0.0)   | 74 (52.9) | 15 (10.7) | 67 (47.9)  | 37 (26.4) | 0 (0.0)   | 72 (51.4) |
| 28 | 108 | 61 (6)  | 75 (69.4)  | 61 (56.5)  | 17 (15.7) | 10 (9.3)  | 20 (18.5) | 65 (60.2) | 24 (22.2) | 67 (62.0)  | 28 (25.9) | 0 (0.0)   | 69 (63.9) |
| 29 | 81  | 56 (8)  | 61 (75.3)  | 25 (30.9)  | 56 (69.1) | 0 (0.0)   | 0 (0.0)   | 52 (64.2) | 20 (24.7) | 41 (50.6)  | 39 (48.1) | 0 (0.0)   | 18 (22.2) |
| 30 | 33  | 69 (8)  | 23 (69.7)  | 0 (0.0)    | 0 (0.0)   | 6 (18.2)  | 27 (81.8) | 16 (48.5) | 8 (24.2)  | 17 (51.5)  | 7 (21.2)  | 11 (33.3) | 14 (42.4) |
| 31 | 60  | 60 (10) | 33 (55.0)  | 3 (5.0)    | 22 (36.7) | 35 (58.3) | 0 (0.0)   | NA        | NA        | NA         | NA        | NA        | 5 (8.3)   |
| 32 | 33  | 64 (11) | 24 (72.7)  | 32 (97.0)  | 1 (3.0)   | 0 (0.0)   | 0 (0.0)   | NA        | NA        | NA         | NA        | NA        | 21 (63.6) |
| 33 | 100 | 61 (9)  | 50 (50.0)  | 31 (31.0)  | 28 (28.0) | 41 (41.0) | 0 (0.0)   | 50 (50.0) | 3 (3.0)   | 69 (69.0)  | 14 (14.0) | 38 (38.0) | 29 (29.0) |
| 34 | 110 | 61 (9)  | 72 (65.5)  | 64 (58.2)  | 46 (41.8) | 0 (0.0)   | 0 (0.0)   | 70 (63.6) | 15 (13.6) | 82 (74.5)  | 24 (21.8) | 45 (40.9) | 44 (40.0) |
| 35 | 116 | 63 (10) | 86 (74.1)  | 10 (8.6)   | 39 (33.6) | 67 (57.8) | 0 (0.0)   | 76 (65.5) | 14 (12.1) | 71 (61.2)  | 25 (21.6) | 27 (23.3) | 63 (54.3) |
| 36 | 144 | 62 (10) | 109 (75.7) | 58 (40.3)  | 86 (59.7) | 0 (0.0)   | 0 (0.0)   | 88 (61.1) | 21 (14.6) | 105 (72.9) | 49 (34.0) | 47 (32.6) | 95 (66.0) |
| 37 | 96  | 65 (9)  | 81 (84.4)  | 24 (25.0)  | 37 (38.5) | 4 (4.2)   | 31 (32.3) | 64 (66.7) | 17 (17.7) | 54 (56.3)  | 27 (28.1) | 40 (41.7) | 90 (93.8) |
| 38 | 76  | 63 (10) | 47 (61.8)  | 22 (28.9)  | 35 (46.1) | 12 (15.8) | 7 (9.2)   | 64 (84.2) | 25 (32.9) | 51 (67.1)  | 9 (11.8)  | 14 (18.4) | 40 (52.6) |
| 39 | 107 | 67 (10) | 69 (64.5)  | 69 (64.5)  | 21 (19.6) | 10 (9.3)  | 7 (6.5)   | 73 (68.2) | 49 (45.8) | 65 (60.7)  | 44 (41.1) | 21 (19.6) | 59 (55.1) |
| 40 | 98  | 60 (10) | 49 (50.0)  | 75 (76.5)  | 20 (20.4) | 0 (0.0)   | 3 (3.1)   | 86 (87.8) | 27 (27.6) | 0 (0.0)    | 24 (24.5) | 24 (24.5) | 45 (45.9) |
| 41 | 20  | 60 (12) | 15 (75.0)  | 20 (100.0) | 0 (0.0)   | 0 (0.0)   | 0 (0.0)   | 0 (0.0)   | 0 (0.0)   | 0 (0.0)    | 0 (0.0)   | 0 (0.0)   | 11 (55.0) |
| 42 | 113 | 64 (10) | 81 (71.7)  | 1 (0.9)    | 2 (1.8)   | 80 (70.8) | 30 (26.5) | 87 (77.0) | 48 (42.5) | 63 (55.8)  | 49 (43.4) | 9 (8.0)   | 90 (79.6) |
| 43 | 13  | 62 (5)  | 8 (61.5)   | 7 (53.8)   | 4 (30.8)  | 1 (7.7)   | 1 (7.7)   | 4 (30.8)  | 0 (0.0)   | 12 (92.3)  | 2 (15.4)  | 6 (46.2)  | 5 (38.5)  |
| 44 | 3   | 54 (16) | 2 (66.7)   | 1 (33.3)   | 1 (33.3)  | 1 (33.3)  | 0 (0.0)   | 0 (0.0)   | 0 (0.0)   | 0 (0.0)    | 0 (0.0)   | 2 (66.7)  | 0 (0.0)   |
| 45 | 60  | 58 (7)  | 23 (38.3)  | 2 (3.3)    | 6 (10.0)  | 14 (23.3) | 38 (63.3) | 4 (6.7)   | 1 (1.7)   | 6 (10.0)   | 10 (16.7) | 1 (1.7)   | 8 (13.3)  |
| 46 | 37  | 60 (6)  | 16 (43.2)  | 6 (16.2)   | 3 (8.1)   | 6 (16.2)  | 22 (59.5) | 12 (32.4) | 6 (16.2)  | 19 (51.4)  | 3 (8.1)   | 10 (27.0) | 10 (27.0) |
| 47 | 37  | 59 (11) | 25 (67.6)  | 5 (13.5)   | 3 (8.1)   | 24 (64.9) | 5 (13.5)  | 6 (16.2)  | 4 (10.8)  | 11 (29.7)  | 15 (40.5) | 16 (43.2) | 27 (73.0) |
| 48 | 32  | 65 (12) | 21 (65.6)  | 1 (3.1)    | 0 (0.0)   | 0 (0.0)   | 31 (96.9) | 19 (59.4) | 4 (12.5)  | 14 (43.8)  | 5 (15.6)  | 13 (40.6) | 6 (18.8)  |
| 49 | 99  | 64 (7)  | 56 (56.6)  | 53 (53.5)  | 39 (39.4) | 7 (7.1)   | 0 (0.0)   | 39 (39.4) | 13 (13.1) | 65 (65.7)  | 16 (16.2) | 9 (9.1)   | 43 (43.4) |
| 50 | 39  | 80 (9)  | 10 (25.6)  | 3 (7.7)    | 0 (0.0)   | 5 (12.8)  | 31 (79.5) | 26 (66.7) | 2 (5.1)   | 13 (33.3)  | 7 (17.9)  | 3 (7.7)   | 11 (28.2) |
| 51 | 22  | 58 (11) | 13 (59.1)  | 6 (27.3)   | 10 (45.5) | 2 (9.1)   | 4 (18.2)  | 10 (45.5) | 3 (13.6)  | 7 (31.8)   | 10 (45.5) | 0 (0.0)   | 12 (54.5) |
| 52 | 36  | 62 (9)  | 24 (66.7)  | 7 (19.4)   | 19 (52.8) | 9 (25.0)  | 1 (2.8)   | 21 (58.3) | 3 (8.3)   | 19 (52.8)  | 18 (50.0) | 0 (0.0)   | 20 (55.6) |
| 53 | 61  | 61 (11) | 37 (60.7)  | 35 (57.4)  | 11 (18.0) | 12 (19.7) | 3 (4.9)   | 36 (59.0) | 4 (6.6)   | 28 (45.9)  | 28 (45.9) | 0 (0.0)   | 33 (54.1) |



|           |     |         |            |            |            |           |           |            |            |            |            |           |            |
|-----------|-----|---------|------------|------------|------------|-----------|-----------|------------|------------|------------|------------|-----------|------------|
| <b>54</b> | 210 | 61 (8)  | 184 (87.6) | 38 (18.1)  | 45 (21.4)  | 34 (16.2) | 93 (44.3) | 137 (65.2) | 105 (50.0) | 104 (49.5) | 60 (28.6)  | 0 (0.0)   | 180 (85.7) |
| <b>55</b> | 75  | 61 (10) | 61 (81.3)  | 31 (41.3)  | 31 (41.3)  | 6 (8.0)   | 7 (9.3)   | 48 (64.0)  | 15 (20.0)  | 23 (30.7)  | 14 (18.7)  | 14 (18.7) | 50 (66.7)  |
| <b>56</b> | 13  | 69 (11) | 7 (53.8)   | 3 (23.1)   | 1 (7.7)    | 1 (7.7)   | 8 (61.5)  | 6 (46.2)   | 2 (15.4)   | 4 (30.8)   | 2 (15.4)   | 0 (0.0)   | 2 (15.4)   |
| <b>57</b> | 24  | 63 (12) | 18 (75.0)  | 15 (62.5)  | 2 (8.3)    | 7 (29.2)  | 0 (0.0)   | 17 (70.8)  | 13 (54.2)  | 14 (58.3)  | 19 (79.2)  | 0 (0.0)   | 9 (37.5)   |
| <b>58</b> | 67  | 61 (12) | 44 (65.7)  | 34 (50.7)  | 15 (22.4)  | 7 (10.4)  | 11 (16.4) | 39 (58.2)  | 16 (23.9)  | 16 (23.9)  | 17 (25.4)  | 0 (0.0)   | 29 (43.3)  |
| <b>59</b> | 574 | 60 (11) | 387 (67.4) | 320 (55.7) | 189 (32.9) | 65 (11.3) | 0 (0.0)   | 296 (51.6) | 136 (23.7) | 180 (31.4) | 157 (27.4) | 0 (0.0)   | 274 (47.7) |
| <b>60</b> | 265 | 62 (8)  | 156 (58.9) | 92 (34.7)  | 118 (44.5) | 6 (2.3)   | 49 (18.5) | NA         | NA         | NA         | NA         | NA        | 152 (57.4) |
| <b>61</b> | 31  | 69 (10) | 22 (71.0)  | 29 (93.5)  | 2 (6.5)    | 0 (0.0)   | 0 (0.0)   | 17 (54.8)  | 7 (22.6)   | 17 (54.8)  | 14 (45.2)  | 0 (0.0)   | 20 (64.5)  |

\* data set numbers for studies are provided in supplementary Table 1.

Supplementary table 6 | Technical characteristics of imaging tests for each data set. Figures are numbers (percentages) unless stated otherwise.

| Study ID | Patients | CT rows |    |    |     |     |     | CT gating     | CTA showing CAD | Effective dose, mean (SD), mSv<br>Effective dose, mean (SD), mSv | kV                                                |
|----------|----------|---------|----|----|-----|-----|-----|---------------|-----------------|------------------------------------------------------------------|---------------------------------------------------|
|          |          | 16      | 32 | 40 | 64  | 128 | 320 |               |                 |                                                                  |                                                   |
| 1        | 49       | 0       | 49 | 0  | 0   | 0   | 0   | retrospective | 30              | 10.0 (1.8)                                                       | 120                                               |
| 2        | 99       | 0       | 0  | 0  | 0   | 99  | 0   | prospective   | 43              | 0.9 (0.2)                                                        | 100                                               |
| 3        | 150      | 0       | 0  | 0  | 150 | 0   | 0   | retrospective | 78              | 8.0 (1.0)                                                        | 120                                               |
| 4        | 80       | 0       | 80 | 0  | 0   | 0   | 0   | retrospective | 53              | 10.1 (1.9)                                                       | 120                                               |
| 5        | 170      | 170     | 0  | 0  | 0   | 0   | 0   | retrospective | 106             | 14.5 (1.1)                                                       | 120 to 140 according to the patient's body weight |
| 6        | 127      | 0       | 0  | 0  | 127 | 0   | 0   | both          | 66              | 19.8 (6.9)                                                       | 120                                               |
| 7        | 65       | 0       | 65 | 0  | 0   | 0   | 0   | retrospective | 55              | 11.2 (3.1)                                                       | 120                                               |
| 8        | 129      | 129     | 0  | 0  | 0   | 0   | 0   | retrospective | 91              | 11.9 (1.4)                                                       | 120                                               |
| 9        | 29       | 0       | 0  | 0  | 0   | 0   | 29  | prospective   | 12              | 6.3 (4.0)                                                        | 120                                               |
| 10       | 26       | 26      | 0  | 0  | 0   | 0   | 0   | retrospective | 18              | NA                                                               | 120                                               |
| 11       | 99       | 0       | 0  | 0  | 99  | 0   | 0   | retrospective | 48              | 25.5 (6.5)                                                       | 120                                               |
| 12       | 50       | 0       | 0  | 0  | 50  | 0   | 0   | both          | 58              | 7.4 (6.0)                                                        | NA                                                |
| 13       | 230      | 230     | 0  | 0  | 0   | 0   | 0   | retrospective | 190             | 6.3 (2.5)                                                        | 120 to 140 according to the patient's body weight |
| 14       | 8        | 0       | 0  | 8  | 0   | 0   | 0   | retrospective | 3               | 10.5 (1.5)                                                       | 120 to 140 according to the patient's body weight |
| 15       | 41       | 41      | 0  | 0  | 0   | 0   | 0   | retrospective | 31              | 11.5 (2.1)                                                       | 140                                               |
| 16       | 75       | 1       | 0  | 58 | 16  | 0   | 0   | retrospective | 30              | 13.6 (2.3)                                                       | 120                                               |
| 17       | 15       | 0       | 0  | 15 | 0   | 0   | 0   | retrospective | 5               | 13.8 (2.1)                                                       | 120                                               |
| 18       | 32       | 0       | 0  | 0  | 32  | 0   | 0   | retrospective | 17              | 7.2 (2.4)                                                        | 120                                               |
| 19       | 42       | 0       | 0  | 42 | 0   | 0   | 0   | retrospective | 27              | NA                                                               | 120                                               |

|    |     |     |     |    |     |   |   |               |     |            |                                                   |
|----|-----|-----|-----|----|-----|---|---|---------------|-----|------------|---------------------------------------------------|
| 20 | 83  | 0   | 0   | 0  | 83  | 0 | 0 | retrospective | 52  | NA         | 120 to 135                                        |
| 21 | 88  | 0   | 88  | 0  | 0   | 0 | 0 | retrospective | 56  | 16.5 (3.8) | 120                                               |
| 22 | 243 | 129 | 0   | 0  | 114 | 0 | 0 | retrospective | 136 | 7.3 (3.0)  | Not explicitly stated*                            |
| 23 | 99  | 0   | 0   | 99 | 0   | 0 | 0 | retrospective | 99  | 15.7 (3.0) | 120 to 140 according to the patient's body weight |
| 24 | 68  | 68  | 0   | 0  | 0   | 0 | 0 | retrospective | 65  | 7.7 (3.8)  | 120                                               |
| 25 | 64  | 64  | 0   | 0  | 0   | 0 | 0 | retrospective | 46  | NA         | 120                                               |
| 26 | 38  | 0   | 38  | 0  | 0   | 0 | 0 | retrospective | 22  | NA         | 120                                               |
| 27 | 140 | 0   | 140 | 0  | 0   | 0 | 0 | retrospective | 80  | NA         | 120                                               |
| 28 | 108 | 0   | 0   | 0  | 0   | 0 | 0 | retrospective | 87  | NA         | 120                                               |
| 29 | 81  | 0   | 81  | 0  | 0   | 0 | 0 | retrospective | 22  | 10.9 (1.8) | 120                                               |
| 30 | 33  | 33  | 0   | 0  | 0   | 0 | 0 | retrospective | 36  | NA         | 140                                               |
| 31 | 60  | 60  | 0   | 0  | 0   | 0 | 0 | retrospective | 39  | 14.3 (1.0) | 120                                               |
| 32 | 33  | 33  | 0   | 0  | 0   | 0 | 0 | retrospective | 29  | 8.6 (1.5)  | 120                                               |
| 33 | 100 | 0   | 51  | 0  | 49  | 0 | 0 | retrospective | 47  | NA         | 120                                               |
| 34 | 110 | 0   | 44  | 0  | 66  | 0 | 0 | retrospective | 61  | 14.5 (4.0) | 120                                               |
| 35 | 116 | 116 | 0   | 0  | 0   | 0 | 0 | retrospective | 91  | 13.1 (2.3) | 120                                               |
| 36 | 144 | 144 | 0   | 0  | 0   | 0 | 0 | retrospective | 117 | 13.2 (2.5) | 120 to 140 according to the patient's body weight |
| 37 | 96  | 0   | 0   | 0  | 96  | 0 | 0 | both          | 91  | 14.1 (8.9) | 120                                               |
| 38 | 76  | 0   | 0   | 0  | 76  | 0 | 0 | retrospective | 52  | NA         | 120                                               |
| 39 | 107 | 0   | 0   | 0  | 107 | 0 | 0 | retrospective | 95  | 15.0 (0.0) | 120                                               |
| 40 | 98  | 0   | 0   | 0  | 98  | 0 | 0 | retrospective | 38  | NA         | 120                                               |
| 41 | 20  | 0   | 0   | 0  | 20  | 0 | 0 | prospective   | 15  | 2.5 (1.1)  | 100 to 120 according to the patient's body weight |
| 42 | 113 | 0   | 113 | 0  | 0   | 0 | 0 | retrospective | 94  | 14.1 (1.5) | 120                                               |
| 43 | 13  | 0   | 0   | 0  | 13  | 0 | 0 | retrospective | 7   | NA         | 120                                               |
| 44 | 3   | 0   | 0   | 0  | 3   | 0 | 0 | retrospective | 2   | 8.3 (4.4)  | NA                                                |
| 45 | 60  | 0   | 0   | 0  | 60  | 0 | 0 | retrospective | 18  | 14.4 (4.2) | 100 to 135                                        |

|    |     |    |   |   |     |    |    |               |     |             |                                                    |
|----|-----|----|---|---|-----|----|----|---------------|-----|-------------|----------------------------------------------------|
| 46 | 37  | 0  | 0 | 0 | 0   | 0  | 37 | prospective   | 15  | 13.0 (4.7)  | 100 and 120                                        |
| 47 | 37  | 0  | 0 | 0 | 0   | 37 | 0  | prospective   | 34  | 1.1 (0.1)   | 100                                                |
| 48 | 32  | 0  | 0 | 0 | 32  | 0  | 0  | prospective   | 11  | 22.7 (14.4) | 120                                                |
| 49 | 99  | 0  | 0 | 0 | 99  | 0  | 0  | both          | 46  | 9.5 (5.2)   | 100 to 120, depending on patient size              |
| 50 | 39  | 0  | 0 | 0 | 39  | 0  | 0  | retrospective | 17  | 36.6 (13.9) | 120                                                |
| 51 | 22  | 0  | 0 | 0 | 22  | 0  | 0  | prospective   | 18  | 2.1 (0.8)   | 100 and 120, according to the patient's BMI        |
| 52 | 36  | 0  | 0 | 0 | 36  | 0  | 0  | prospective   | 22  | 2.1 (0.7)   | 100 and 120, according to the patient's BMI        |
| 53 | 61  | 0  | 0 | 0 | 61  | 0  | 0  | prospective   | 39  | 2.1 (0.7)   | 100 and 120, according to the patient's BMI        |
| 54 | 210 | 0  | 0 | 0 | 210 | 0  | 0  | retrospective | 192 | 14.6 (1.7)  | 120                                                |
| 55 | 75  | 0  | 0 | 0 | 75  | 0  | 0  | retrospective | 51  | 16.3 (1.8)  | 120                                                |
| 56 | 13  | 13 | 0 | 0 | 0   | 0  | 0  | retrospective | 3   | NA          | no information                                     |
| 57 | 24  | 0  | 0 | 0 | 0   | 24 | 0  | retrospective | 8   | NA          | 120                                                |
| 58 | 67  | 0  | 0 | 0 | 0   | 67 | 0  | retrospective | 39  | NA          | 120                                                |
| 59 | 574 | 0  | 0 | 0 | 574 | 0  | 0  | prospective   | 608 | 18.3 (7.3)  | 100 to 140, according to the patient's body weight |
| 60 | 79  | 0  | 0 | 0 | 0   | 0  | 79 | retrospective | 34  | NA          | 120                                                |
| 61 | 31  | 0  | 0 | 0 | 31  | 0  | 0  | retrospective | 21  | 9.9 (5.0)   | 120                                                |

\* original citations from the publication: “To decrease radiation exposure, we consequently used dose-saving algorithms including prospective ECG-gated tube current modulation and 100 kV acquisition protocols, whenever possible.”

Supplementary Table 7 | Empirical data of female patients and their assignment to pretest probability categories

| Female patients                | Participants | Pretest probability categories |            |            |            |            |            |            |            |            |            |
|--------------------------------|--------------|--------------------------------|------------|------------|------------|------------|------------|------------|------------|------------|------------|
|                                | Overall      | 0 to <10%                      | 10 to <20% | 20 to <30% | 30 to <40% | 40 to <50% | 50 to <60% | 60 to <70% | 70 to <80% | 80 to <90% | 90 to 100% |
| <b>N</b>                       | 1859         | 86                             | 501        | 390        | 218        | 169        | 245        | 199        | 51         | 0          | 0          |
| <b>TP</b>                      | 533          | 14                             | 114        | 97         | 69         | 52         | 90         | 68         | 29         | -          | -          |
| <b>TN</b>                      | 927          | 52                             | 292        | 210        | 104        | 81         | 107        | 72         | 9          | -          | -          |
| <b>FP</b>                      | 147          | 6                              | 35         | 40         | 21         | 11         | 17         | 12         | 5          | -          | -          |
| <b>FN</b>                      | 34           | 1                              | 3          | 7          | 4          | 4          | 8          | 7          | 0          | -          | -          |
| <b>NDX</b>                     | 218          | 13                             | 57         | 36         | 20         | 21         | 23         | 40         | 8          | -          | -          |
| <b>NDX rate (%)</b>            | 11.7         | 15.1                           | 11.4       | 9.2        | 9.2        | 12.4       | 9.4        | 20.1       | 15.7       | -          | -          |
| <b>PPV (%)</b>                 | 78.4         | 70.0                           | 76.5       | 70.8       | 76.7       | 82.5       | 84.1       | 85.0       | 85.3       | -          | -          |
| <b>NPV (%)</b>                 | 96.5         | 98.1                           | 99.0       | 96.8       | 96.3       | 95.3       | 93.0       | 91.1       | 100.0      | -          | -          |
| <b>Sensitivity (%)</b>         | 94.0         | 93.3                           | 97.4       | 93.3       | 94.5       | 92.9       | 91.8       | 90.7       | 100.0      | -          | -          |
| <b>Specificity (%)</b>         | 86.3         | 89.7                           | 89.3       | 84.0       | 83.2       | 88.0       | 86.3       | 85.7       | 64.3       | -          | -          |
| <b>Diagnostic accuracy (%)</b> | 89.0         | 90.4                           | 91.4       | 86.7       | 87.4       | 89.9       | 88.7       | 88.1       | 88.4       | -          | -          |
| <b>LR+</b>                     | 6.87         | 9.02                           | 9.10       | 5.83       | 5.63       | 7.77       | 6.70       | 6.35       | 2.80       | -          | -          |
| <b>LR-</b>                     | 0.07         | 0.07                           | 0.03       | 0.08       | 0.07       | 0.08       | 0.09       | 0.11       | 0.00       | -          | -          |

Supplementary Table 8 | Empirical data of male patients and their assignment to pretest probability categories

| Male patients                  | Participants | Pretest probability categories |           |            |            |            |            |            |            |            |            |
|--------------------------------|--------------|--------------------------------|-----------|------------|------------|------------|------------|------------|------------|------------|------------|
|                                |              | Overall                        | 0 to <10% | 10 to <20% | 20 to <30% | 30 to <40% | 40 to <50% | 50 to <60% | 60 to <70% | 70 to <80% | 80 to <90% |
| <b>N</b>                       | 3473         | 0                              | 29        | 211        | 509        | 576        | 507        | 391        | 484        | 698        | 68         |
| <b>TP</b>                      | 1718         | -                              | 6         | 79         | 203        | 269        | 220        | 188        | 288        | 420        | 45         |
| <b>TN</b>                      | 1104         | -                              | 21        | 102        | 230        | 206        | 187        | 122        | 94         | 134        | 8          |
| <b>FP</b>                      | 228          | -                              | 1         | 13         | 28         | 48         | 38         | 27         | 33         | 38         | 2          |
| <b>FN</b>                      | 87           | -                              | 0         | 3          | 14         | 7          | 9          | 15         | 17         | 21         | 1          |
| <b>NDX</b>                     | 336          | -                              | 1         | 14         | 34         | 46         | 53         | 39         | 52         | 85         | 12         |
| <b>NDX rate (%)</b>            | 9,7          | -                              | 3.4       | 6.6        | 6.7        | 8.0        | 10.5       | 10.0       | 10.7       | 12.2       | 17.6       |
| <b>PPV (%)</b>                 | 88,3         | -                              | 85.7      | 85.9       | 87.9       | 84.9       | 85.3       | 87.4       | 89.7       | 91.7       | 95.7       |
| <b>NPV (%)</b>                 | 92,7         | -                              | 100.0     | 97.1       | 94.3       | 96.7       | 95.4       | 89.1       | 84.7       | 86.5       | 88.9       |
| <b>Sensitivity (%)</b>         | 95,2         | -                              | 100.0     | 96.3       | 93.5       | 97.5       | 96.1       | 92.6       | 94.4       | 95.2       | 97.8       |
| <b>Specificity (%)</b>         | 82,9         | -                              | 95.5      | 88.7       | 89.1       | 81.1       | 83.1       | 81.9       | 74.0       | 77.9       | 80.0       |
| <b>Diagnostic accuracy (%)</b> | 90,0         | -                              | 96.4      | 91.9       | 91.2       | 89.6       | 89.6       | 88.1       | 88.4       | 90.4       | 94.6       |
| <b>LR+</b>                     | 5,56         | -                              | 22.00     | 8.52       | 8.62       | 5.16       | 5.69       | 5.11       | 3.63       | 4.31       | 4.89       |
| <b>LR-</b>                     | 0,06         | -                              | 0.00      | 0.04       | 0.07       | 0.03       | 0.05       | 0.09       | 0.08       | 0.06       | 0.03       |

**Supplementary table 9 | Predictors of non-diagnostic CTA results**

| <b>Random effects</b> |          |                    |
|-----------------------|----------|--------------------|
| Group                 | Variance | Standard deviation |
| Study_No (Intercept)  | 2.632    | 1.622              |

| <b>Fixed effects</b> |          |                |         |         |
|----------------------|----------|----------------|---------|---------|
| Group                | Estimate | Standard error | Z value | P value |
| Intercept            | -5.066   | 0.415          | -12.242 | <0.001  |
| Age >75              | -0.009   | 0.166          | -0.055  | 0.9560  |
| Male                 | -0.200   | 0.107          | -1.877  | 0.605   |
| Heart rate           | 0.028    | 0.005          | 5.990   | <0.001  |

Supplementary Table 10 | Patients ≤50 years and their assignment to pretest probability categories

| Patients ≤ 50 years            | Participants | Pretest probability categories |           |            |            |            |            |            |            |            |            |
|--------------------------------|--------------|--------------------------------|-----------|------------|------------|------------|------------|------------|------------|------------|------------|
|                                |              | Overall                        | 0 to <10% | 10 to <20% | 20 to <30% | 30 to <40% | 40 to <50% | 50 to <60% | 60 to <70% | 70 to <80% | 80 to <90% |
| <b>N</b>                       | 817          | 86                             | 113       | 185        | 120        | 107        | 3          | 107        | 96         | 0          | 0          |
| <b>TP</b>                      | 255          | 14                             | 19        | 69         | 26         | 39         | 0          | 40         | 48         | -          | -          |
| <b>TN</b>                      | 397          | 52                             | 71        | 89         | 71         | 49         | 2          | 40         | 23         | -          | -          |
| <b>FP</b>                      | 51           | 6                              | 5         | 12         | 6          | 7          | 1          | 7          | 7          | -          | -          |
| <b>FN</b>                      | 21           | 1                              | 2         | 3          | 1          | 2          | 0          | 6          | 6          | -          | -          |
| <b>NDX</b>                     | 93           | 13                             | 16        | 12         | 16         | 10         | 0          | 14         | 12         | -          | -          |
| <b>NDX rate (%)</b>            | 11.4         | 15.1                           | 14.2      | 6.5        | 13.3       | 9.3        | 0.0        | 13.1       | 12.5       | -          | -          |
| <b>PPV (%)</b>                 | 83.3         | 70.0                           | 79.2      | 85.2       | 81.3       | 84.8       | 0.0        | 85.1       | 87.3       | -          | -          |
| <b>NPV (%)</b>                 | 95.0         | 98.1                           | 97.3      | 96.7       | 98.6       | 96.1       | 100.0      | 87.0       | 79.3       | -          | -          |
| <b>Sensitivity (%)</b>         | 92.4         | 93.3                           | 90.5      | 95.8       | 96.3       | 95.1       | n/a*       | 87.0       | 88.9       | -          | -          |
| <b>Specificity (%)</b>         | 88.6         | 89.7                           | 93.4      | 88.1       | 92.2       | 87.5       | 66.7       | 85.1       | 76.7       | -          | -          |
| <b>Diagnostic accuracy (%)</b> | 90.1         | 90.4                           | 92.8      | 91.3       | 93.3       | 90.7       | 66.7       | 86.0       | 84.5       | -          | -          |
| <b>LR+</b>                     | 8.12         | 9.02                           | 13.75     | 8.07       | 12.36      | 7.61       | n/a*       | 5.84       | 3.81       | -          | -          |
| <b>LR-</b>                     | 0.09         | 0.07                           | 0.10      | 0.05       | 0.04       | 0.06       | n/a*       | 0.15       | 0.14       | -          | -          |

\* n/a = not applicable (division by 0)



Supplementary Table 11 | Patients >50 to ≤65 years and their assignment to pretest probability categories

| Patients >50 to ≤ 65 years     | Participants | Pretest probability categories |            |            |            |            |            |            |            |            |            |
|--------------------------------|--------------|--------------------------------|------------|------------|------------|------------|------------|------------|------------|------------|------------|
|                                |              | 0 to <10%                      | 10 to <20% | 20 to <30% | 30 to <40% | 40 to <50% | 50 to <60% | 60 to <70% | 70 to <80% | 80 to <90% | 90 to 100% |
| <b>N</b>                       | 2619         | 0                              | 344        | 242        | 432        | 425        | 538        | 0          | 317        | 321        | 0          |
| <b>TP</b>                      | 1100         | -                              | 83         | 50         | 186        | 171        | 215        | -          | 201        | 194        | -          |
| <b>TN</b>                      | 1039         | -                              | 201        | 140        | 182        | 172        | 223        | -          | 54         | 67         | -          |
| <b>FP</b>                      | 173          | -                              | 24         | 21         | 25         | 31         | 36         | -          | 19         | 17         | -          |
| <b>FN</b>                      | 48           | -                              | 1          | 3          | 14         | 7          | 11         | -          | 8          | 4          | -          |
| <b>NDX</b>                     | 259          | -                              | 35         | 28         | 25         | 44         | 53         | -          | 35         | 39         | -          |
| <b>NDX rate (%)</b>            | 9.9          | -                              | 10.2       | 11.6       | 5.8        | 10.4       | 9.9        | -          | 11.0       | 12.1       | -          |
| <b>PPV (%)</b>                 | 86.4         | -                              | 77.6       | 70.4       | 88.2       | 84.7       | 85.7       | -          | 91.4       | 91.9       | -          |
| <b>NPV (%)</b>                 | 95.6         | -                              | 99.5       | 97.9       | 92.9       | 96.1       | 95.3       | -          | 87.1       | 94.4       | -          |
| <b>Sensitivity (%)</b>         | 95.8         | -                              | 98.8       | 94.3       | 93.0       | 96.1       | 95.1       | -          | 96.2       | 98.0       | -          |
| <b>Specificity (%)</b>         | 85.7         | -                              | 89.3       | 87.0       | 87.9       | 84.7       | 86.1       | -          | 74.0       | 79.8       | -          |
| <b>Diagnostic accuracy (%)</b> | 90.6         | -                              | 91.9       | 88.8       | 90.4       | 90.0       | 90.3       | -          | 90.4       | 92.6       | -          |
| <b>LR+</b>                     | 6.71         | -                              | 9.26       | 7.23       | 7.70       | 6.29       | 6.84       | -          | 3.70       | 4.84       | -          |
| <b>LR-</b>                     | 0.05         | -                              | 0.01       | 0.07       | 0.08       | 0.05       | 0.06       | -          | 0.05       | 0.03       | -          |

Supplementary Table 12 | Patients >65 to ≤ 75 years and their assignment to pretest probability categories

| Patients >65 to ≤ 75 years     | Participants | Pretest probability categories |            |            |            |            |            |            |            |            |            |
|--------------------------------|--------------|--------------------------------|------------|------------|------------|------------|------------|------------|------------|------------|------------|
|                                |              | 0 to <10%                      | 10 to <20% | 20 to <30% | 30 to <40% | 40 to <50% | 50 to <60% | 60 to <70% | 70 to <80% | 80 to <90% | 90 to 100% |
| <b>N</b>                       | 1434         | 0                              | 73         | 116        | 133        | 180        | 160        | 434        | 0          | 338        | 0          |
| <b>TP</b>                      | 692          | -                              | 18         | 42         | 53         | 98         | 71         | 199        | -          | 211        | -          |
| <b>TN</b>                      | 451          | -                              | 41         | 48         | 57         | 56         | 56         | 138        | -          | 55         | -          |
| <b>FP</b>                      | 109          | -                              | 7          | 14         | 13         | 15         | 13         | 28         | -          | 19         | -          |
| <b>FN</b>                      | 38           | -                              | 0          | 4          | 2          | 2          | 3          | 13         | -          | 14         | -          |
| <b>NDX</b>                     | 144          | -                              | 7          | 8          | 8          | 9          | 17         | 56         | -          | 39         | -          |
| <b>NDX rate (%)</b>            | 10.0         | -                              | 9.6        | 6.9        | 6.0        | 5.0        | 10.6       | 12.9       | -          | 11.5       | -          |
| <b>PPV (%)</b>                 | 86.4         | -                              | 72.0       | 75.0       | 80.3       | 86.7       | 84.5       | 87.7       | -          | 91.7       | -          |
| <b>NPV (%)</b>                 | 92.2         | -                              | 100.0      | 92.3       | 96.6       | 96.6       | 94.9       | 91.4       | -          | 79.7       | -          |
| <b>Sensitivity (%)</b>         | 94.8         | -                              | 100.0      | 91.3       | 96.4       | 98.0       | 95.9       | 93.9       | -          | 93.8       | -          |
| <b>Specificity (%)</b>         | 80.5         | -                              | 85.4       | 77.4       | 81.4       | 78.9       | 81.2       | 83.1       | -          | 74.3       | -          |
| <b>Diagnostic accuracy (%)</b> | 88.6         | -                              | 89.4       | 83.3       | 88.0       | 90.1       | 88.8       | 89.2       | -          | 89.0       | -          |
| <b>LR+</b>                     | 4.87         | -                              | 6.86       | 4.04       | 5.19       | 4.64       | 5.09       | 5.57       | -          | 3.65       | -          |
| <b>LR-</b>                     | 0.06         | -                              | 0.00       | 0.11       | 0.04       | 0.03       | 0.05       | 0.07       | -          | 0.08       | -          |

Supplementary Table 13 | Patients >75 years and their assignment to pretest probability categories

| Patients >75 years             | Participants | Pretest probability categories |           |            |            |            |            |            |            |            |            |
|--------------------------------|--------------|--------------------------------|-----------|------------|------------|------------|------------|------------|------------|------------|------------|
|                                |              | Overall                        | 0 to <10% | 10 to <20% | 20 to <30% | 30 to <40% | 40 to <50% | 50 to <60% | 60 to <70% | 70 to <80% | 80 to <90% |
| <b>N</b>                       | 462          | 0                              | 0         | 58         | 42         | 33         | 51         | 49         | 122        | 39         | 68         |
| <b>TP</b>                      | 204          | -                              | -         | 15         | 7          | 13         | 24         | 17         | 68         | 15         | 45         |
| <b>TN</b>                      | 144          | -                              | -         | 35         | 24         | 10         | 13         | 16         | 26         | 12         | 8          |
| <b>FP</b>                      | 42           | -                              | -         | 6          | 5          | 6          | 5          | 4          | 12         | 2          | 2          |
| <b>FN</b>                      | 14           | -                              | -         | 0          | 1          | 0          | 3          | 3          | 3          | 3          | 1          |
| <b>NDX</b>                     | 58           | -                              | -         | 2          | 5          | 4          | 6          | 9          | 13         | 7          | 12         |
| <b>NDX rate (%)</b>            | 12.6         | -                              | -         | 3.4        | 11.9       | 12.1       | 11.8       | 18.4       | 10.7       | 17.9       | 17.6       |
| <b>PPV (%)</b>                 | 82.9         | -                              | -         | 71.4       | 58.3       | 68.4       | 82.8       | 81.0       | 85.0       | 88.2       | 95.7       |
| <b>NPV (%)</b>                 | 91.1         | -                              | -         | 100.0      | 96.0       | 100.0      | 81.3       | 84.2       | 89.7       | 80.0       | 88.9       |
| <b>Sensitivity (%)</b>         | 93.6         | -                              | -         | 100.0      | 87.5       | 100.0      | 88.9       | 85.0       | 95.8       | 83.3       | 97.8       |
| <b>Specificity (%)</b>         | 77.4         | -                              | -         | 85.4       | 82.8       | 62.5       | 72.2       | 80.0       | 68.4       | 85.7       | 80.0       |
| <b>Diagnostic accuracy (%)</b> | 86.1         | -                              | -         | 89.3       | 83.8       | 79.3       | 82.2       | 82.5       | 86.2       | 84.4       | 94.6       |
| <b>LR+</b>                     | 4.14         | -                              | -         | 6.83       | 5.08       | 2.67       | 3.20       | 4.25       | 3.03       | 5.83       | 4.89       |
| <b>LR-</b>                     | 0.08         | -                              | -         | 0.00       | 0.15       | 0.00       | 0.15       | 0.19       | 0.06       | 0.19       | 0.03       |

Supplementary Table 14 | Patients with typical angina and their assignment to pretest probability categories

| Typical angina                 | Participants | Pretest probability categories |           |            |            |            |            |            |            |            |            |
|--------------------------------|--------------|--------------------------------|-----------|------------|------------|------------|------------|------------|------------|------------|------------|
|                                |              | Overall                        | 0 to <10% | 10 to <20% | 20 to <30% | 30 to <40% | 40 to <50% | 50 to <60% | 60 to <70% | 70 to <80% | 80 to <90% |
| <b>N</b>                       | 1967         | 0                              | 0         | 4          | 43         | 137        | 247        | 306        | 464        | 698        | 68         |
| <b>TP</b>                      | 989          | -                              | -         | 1          | 9          | 39         | 89         | 108        | 278        | 420        | 45         |
| <b>TN</b>                      | 547          | -                              | -         | 3          | 23         | 72         | 109        | 112        | 86         | 134        | 8          |
| <b>FP</b>                      | 116          | -                              | -         | 0          | 3          | 5          | 18         | 19         | 31         | 38         | 2          |
| <b>FN</b>                      | 62           | -                              | -         | 0          | 1          | 4          | 8          | 13         | 14         | 21         | 1          |
| <b>NDX</b>                     | 253          | -                              | -         | 0          | 7          | 17         | 23         | 54         | 55         | 85         | 12         |
| <b>NDX rate (%)</b>            | 12.9         | -                              | -         | 0.0        | 16.3       | 12.4       | 9.3        | 17.6       | 11.9       | 12.2       | 17.6       |
| <b>PPV (%)</b>                 | 89.5         | -                              | -         | 100.0      | 75.0       | 88.6       | 83.2       | 85.0       | 90.0       | 91.7       | 95.7       |
| <b>NPV (%)</b>                 | 89.8         | -                              | -         | 100.0      | 95.8       | 94.7       | 93.2       | 89.6       | 86.0       | 86.5       | 88.9       |
| <b>Sensitivity (%)</b>         | 94.1         | -                              | -         | 100.0      | 90.0       | 90.7       | 91.8       | 89.3       | 95.2       | 95.2       | 97.8       |
| <b>Specificity (%)</b>         | 82.5         | -                              | -         | 100.0      | 88.5       | 93.5       | 85.8       | 85.5       | 73.5       | 77.9       | 80.0       |
| <b>Diagnostic accuracy (%)</b> | 89.6         | -                              | -         | 100.0      | 88.9       | 92.5       | 88.4       | 87.3       | 89.0       | 90.4       | 94.6       |
| <b>LR+</b>                     | 5.38         | -                              | -         | n/a*       | 7.80       | 13.97      | 6.47       | 6.15       | 3.59       | 4.31       | 4.89       |
| <b>LR-</b>                     | 0.07         | -                              | -         | 0.00       | 0.11       | 0.10       | 0.10       | 0.13       | 0.07       | 0.06       | 0.03       |

\* n/a = not applicable (division by 0)

Supplementary Table 15 | Patients with atypical angina and their assignment to pretest probability categories

| Atypical angina                | Participants | Pretest probability categories |           |            |            |            |            |            |            |            |            |
|--------------------------------|--------------|--------------------------------|-----------|------------|------------|------------|------------|------------|------------|------------|------------|
|                                |              | Overall                        | 0 to <10% | 10 to <20% | 20 to <30% | 30 to <40% | 40 to <50% | 50 to <60% | 60 to <70% | 70 to <80% | 80 to <90% |
| <b>N</b>                       | 1592         | 1                              | 138       | 269        | 235        | 280        | 339        | 260        | 70         | 0          | 0          |
| <b>TP</b>                      | 579          | 0                              | 23        | 53         | 73         | 110        | 142        | 140        | 38         | -          | -          |
| <b>TN</b>                      | 691          | 1                              | 86        | 150        | 120        | 108        | 136        | 73         | 17         | -          | -          |
| <b>FP</b>                      | 136          | 0                              | 8         | 29         | 19         | 32         | 22         | 19         | 7          | -          | -          |
| <b>FN</b>                      | 27           | 0                              | 2         | 5          | 2          | 4          | 4          | 7          | 3          | -          | -          |
| <b>NDX</b>                     | 159          | 0                              | 19        | 32         | 21         | 26         | 35         | 21         | 5          | -          | -          |
| <b>NDX rate (%)</b>            | 10.0         | 0.0                            | 13.8      | 11.9       | 8.9        | 9.3        | 10.3       | 8.1        | 7.1        | -          | -          |
| <b>PPV (%)</b>                 | 81.0         | n/a*                           | 74.2      | 64.6       | 79.3       | 77.5       | 86.6       | 88.1       | 84.4       | -          | -          |
| <b>NPV (%)</b>                 | 96.2         | 100.0                          | 97.7      | 96.8       | 98.4       | 96.4       | 97.1       | 91.3       | 85.0       | -          | -          |
| <b>Sensitivity (%)</b>         | 95.5         | n/a*                           | 92.0      | 91.4       | 97.3       | 96.5       | 97.3       | 95.2       | 92.7       | -          | -          |
| <b>Specificity (%)</b>         | 83.6         | 100.0                          | 91.5      | 83.8       | 86.3       | 77.1       | 86.1       | 79.3       | 70.8       | -          | -          |
| <b>Diagnostic accuracy (%)</b> | 88.6         | 100.0                          | 91.6      | 85.7       | 90.2       | 85.8       | 91.4       | 89.1       | 84.6       | -          | -          |
| <b>LR+</b>                     | 5.81         | n/a*                           | 10.81     | 5.64       | 7.12       | 4.22       | 6.99       | 4.61       | 3.18       | -          | -          |
| <b>LR-</b>                     | 0.05         | n/a*                           | 0.09      | 0.10       | 0.03       | 0.05       | 0.03       | 0.06       | 0.10       | -          | -          |

\* n/a = not applicable (division by 0)

Supplementary Table 16 | Patients with non-anginal chest discomfort and their assignment to pretest probability categories

| Non-anginal chest discomfort   | Participants | Pretest probability categories |           |            |            |            |            |            |            |            |            |
|--------------------------------|--------------|--------------------------------|-----------|------------|------------|------------|------------|------------|------------|------------|------------|
|                                |              | Overall                        | 0 to <10% | 10 to <20% | 20 to <30% | 30 to <40% | 40 to <50% | 50 to <60% | 60 to <70% | 70 to <80% | 80 to <90% |
| <b>N</b>                       | 796          | 38                             | 162       | 157        | 188        | 158        | 80         | 12         | 1          | 0          | 0          |
| <b>TP</b>                      | 294          | 6                              | 37        | 64         | 72         | 73         | 35         | 6          | 1          | -          | -          |
| <b>TN</b>                      | 347          | 19                             | 87        | 71         | 83         | 58         | 27         | 2          | 0          | -          | -          |
| <b>FP</b>                      | 55           | 4                              | 16        | 11         | 9          | 10         | 4          | 1          | 0          | -          | -          |
| <b>FN</b>                      | 17           | 1                              | 1         | 2          | 9          | 1          | 3          | 0          | 0          | -          | -          |
| <b>NDX</b>                     | 83           | 8                              | 21        | 9          | 15         | 16         | 11         | 3          | 0          | -          | -          |
| <b>NDX rate (%)</b>            | 10.4         | 21.1                           | 13.0      | 5.7        | 8.0        | 10.1       | 13.8       | 25.0       | 0.0        | -          | -          |
| <b>PPV (%)</b>                 | 84.2         | 60.0                           | 69.8      | 85.3       | 88.9       | 88.0       | 89.7       | 85.7       | 100.0      | -          | -          |
| <b>NPV (%)</b>                 | 95.3         | 95.0                           | 98.9      | 97.3       | 90.2       | 98.3       | 90.0       | 100.0      | n/a*       | -          | -          |
| <b>Sensitivity (%)</b>         | 94.5         | 85.7                           | 97.4      | 97.0       | 88.9       | 98.6       | 92.1       | 100.0      | 100.0      | -          | -          |
| <b>Specificity (%)</b>         | 86.3         | 82.6                           | 84.5      | 86.6       | 90.2       | 85.3       | 87.1       | 66.7       | n/a*       | -          | -          |
| <b>Diagnostic accuracy (%)</b> | 89.9         | 83.3                           | 87.9      | 91.2       | 89.6       | 92.3       | 89.9       | 88.9       | 100.0      | -          | -          |
| <b>LR+</b>                     | 6.91         | 4.93                           | 6.27      | 7.23       | 9.09       | 6.71       | 7.14       | 3.00       | n/a*       | -          | -          |
| <b>LR-</b>                     | 0.06         | 0.17                           | 0.03      | 0.03       | 0.12       | 0.02       | 0.09       | 0.00       | n/a*       | -          | -          |

\* n/a = not applicable (division by 0)

**Supplementary Table 17 | Patients with other chest discomfort and their assignment to pretest probability categories**

| Other chest discomfort         | Participants | Pretest probability categories |            |             |            |             |             |             |             |             |             |
|--------------------------------|--------------|--------------------------------|------------|-------------|------------|-------------|-------------|-------------|-------------|-------------|-------------|
|                                |              | Overall                        | 0 to <10 % | 10 to <20 % | 20 to <30% | 30 to <40 % | 40 to <50 % | 50 to <60 % | 60 to <70 % | 70 to <80 % | 80 to <90 % |
| <b>N</b>                       | 977          | 47                             | 230        | 171         | 261        | 170         | 86          | 12          | 0           | 0           | 0           |
| <b>TP</b>                      | 389          | 8                              | 60         | 58          | 118        | 99          | 44          | 2           | -           | -           | -           |
| <b>TN</b>                      | 446          | 32                             | 140        | 88          | 108        | 49          | 22          | 7           | -           | -           | -           |
| <b>FP</b>                      | 68           | 2                              | 12         | 13          | 18         | 12          | 11          | 0           | -           | -           | -           |
| <b>FN</b>                      | 15           | 0                              | 0          | 3           | 6          | 2           | 2           | 2           | -           | -           | -           |
| <b>NDX</b>                     | 59           | 5                              | 18         | 9           | 11         | 8           | 7           | 1           | -           | -           | -           |
| <b>NDX rate (%)</b>            | 6,0          | 10,6                           | 7,8        | 5,3         | 4,2        | 4,7         | 8,1         | 8,3         | -           | -           | -           |
| <b>PPV (%)</b>                 | 85.1         | 80.0                           | 83.3       | 81.7        | 86.8       | 89.2        | 80.0        | 100.0       | -           | -           | -           |
| <b>NPV (%)</b>                 | 96.7         | 100.0                          | 100.0      | 96.7        | 94.7       | 96.1        | 91.7        | 77.8        | -           | -           | -           |
| <b>Sensitivity (%)</b>         | 96.3         | 100.0                          | 100.0      | 95.1        | 95.2       | 98.0        | 95.7        | 50.0        | -           | -           | -           |
| <b>Specificity (%)</b>         | 86.8         | 94.1                           | 92.1       | 87.1        | 85.7       | 80.3        | 66.7        | 100.0       | -           | -           | -           |
| <b>Diagnostic accuracy (%)</b> | 91.0         | 95.2                           | 94.3       | 90.1        | 90.4       | 91.4        | 83.5        | 81.8        | -           | -           | -           |
| <b>LR+</b>                     | 7.28         | 17.00                          | 12.67      | 7.39        | 6.66       | 4.98        | 2.87        | n/a*        | -           | -           | -           |
| <b>LR-</b>                     | 0.04         | 0.00                           | 0.00       | 0.06        | 0.06       | 0.02        | 0.07        | 0.50        | -           | -           | -           |

\* n/a = not applicable (division by 0) **Supplementary table 19 | References of included studies in this analysis**

1. Alkadhi H, Scheffel H, Desbiolles L, et al. Dual-source computed tomography coronary angiography: influence of obesity, calcium load, and heart rate on diagnostic accuracy. *European heart journal* 2008; **29**(6): 766-76.
2. Alkadhi H, Stolzmann P, Desbiolles L, et al. Low-dose, 128-slice, dual-source CT coronary angiography: accuracy and radiation dose of the high-pitch and the step-and-shoot mode. *Heart* 2010; **96**(12): 933-8.
3. Andreini D, Pontone G, Bartorelli AL, et al. Comparison of the diagnostic performance of 64-slice computed tomography coronary angiography in diabetic and non-diabetic patients with suspected coronary artery disease. *Cardiovascular diabetology* 2010; **9**: 80.
4. Andreini D, Pontone G, Bartorelli AL, et al. Sixty-four-slice multidetector computed tomography: an accurate imaging modality for the evaluation of coronary arteries in dilated cardiomyopathy of unknown etiology. *Circulation Cardiovascular imaging* 2009; **2**(3): 199-205.
5. Andreini D, Pontone G, Pepi M, et al. Diagnostic accuracy of multidetector computed tomography coronary angiography in patients with dilated cardiomyopathy. *Journal of the American*

*College of Cardiology* 2007; **49**(20): 2044-50.

6. Arnoldi E, Ramos-Duran I, Abro JA, et al. [Coronary CT angiography using prospective ECG triggering: high diagnostic accuracy with low radiation dose]. *Der Radiologe* 2010; **50**(6): 500-6.
7. Bettencourt N, Rocha J, Carvalho M, et al. Multislice computed tomography in the exclusion of coronary artery disease in patients with presurgical valve disease. *Circulation Cardiovascular imaging* 2009; **2**(4): 306-13.
8. Bonmassari R, Muraglia S, Centonze M, Coser D, Stoppa G, Disertori M. Noninvasive detection of coronary artery stenosis with 16-slice spiral computed tomography in a population at low to moderate risk for coronary artery disease. *Journal of cardiovascular medicine* 2006; **7**(11): 817-25.
9. Chen CC, Chen CC, Hsieh IC, et al. The effect of calcium score on the diagnostic accuracy of coronary computed tomography angiography. *The international journal of cardiovascular imaging* 2011; **27 Suppl 1**: 37-42.
10. Chow BJ, Dennie C, Hoffmann U, et al. Comparison of computed tomographic angiography versus rubidium-82 positron emission tomography for the detection of patients with anatomical coronary artery disease. *The Canadian journal of cardiology* 2007; **23**(10): 801-7.
11. Dewey M, Teige F, Schnapauff D, et al. Noninvasive detection of coronary artery stenoses with multislice computed tomography or magnetic resonance imaging. *Annals of internal medicine* 2006; **145**(6): 407-15.
12. Dewey M, Zimmermann E, Deissenrieder F, et al. Noninvasive coronary angiography by 320-row computed tomography with lower radiation exposure and maintained diagnostic accuracy: comparison of results with cardiac catheterization in a head-to-head pilot investigation. *Circulation* 2009; **120**(10): 867-75.
13. Diederichsen AC, Petersen H, Jensen LO, et al. Diagnostic value of cardiac 64-slice computed tomography: importance of coronary calcium. *Scandinavian cardiovascular journal : SCJ* 2009; **43**(5): 337-44.
14. Garcia MJ, Lessick J, Hoffmann MH, Investigators CS. Accuracy of 16-row multidetector computed tomography for the assessment of coronary artery stenosis. *Jama* 2006; **296**(4): 403-11.
15. Ghostine S, Caussin C, Daoud B, et al. Non-invasive detection of coronary artery disease in patients with left bundle branch block using 64-slice computed tomography. *Journal of the American College of Cardiology* 2006; **48**(10): 1929-34.
16. Ghostine S, Caussin C, Habis M, et al. Non-invasive diagnosis of ischaemic heart failure using 64-slice computed tomography. *European heart journal* 2008; **29**(17): 2133-40.
17. Gueret P, Deux JF, Bonello L, et al. Diagnostic performance of computed tomography coronary angiography (from the Prospective National Multicenter Multivendor EVASCAN Study). *The American journal of cardiology* 2013; **111**(4): 471-8.
18. Halon DA, Gaspar T, Adawi S, et al. Uses and limitations of 40 slice multi-detector row spiral computed tomography for diagnosing coronary lesions in unselected patients referred for routine invasive coronary angiography. *Cardiology* 2007; **108**(3): 200-9.
19. Halvorsen BA, Rodevand O, Hagen G, Herud E, Mielczarek W, Molstad P. [Angiography with 64-channel CT upon suspicion of stable coronary disease]. *Tidsskrift for den Norske lægeforening : tidsskrift for praktisk medicin, ny række* 2008; **128**(19): 2172-6.
20. Hamdan A, Asbach P, Wellnhofer E, et al. A prospective study for comparison of MR and CT imaging for detection of coronary artery stenosis. *JACC Cardiovascular imaging* 2011; **4**(1): 50-61.
21. Hausleiter J, Meyer T, Hadamitzky M, et al. Non-invasive coronary computed tomographic angiography for patients with suspected coronary artery disease: the Coronary Angiography by Computed Tomography with the Use of a Submillimeter resolution (CACTUS) trial. *European heart journal* 2007; **28**(24): 3034-41.
22. Herzog BA, Husmann L, Burkhard N, et al. Accuracy of low-dose computed



- tomography coronary angiography using prospective electrocardiogram-triggering: first clinical experience. *European heart journal* 2008; **29**(24): 3037-42.
23. Herzog BA, Wyss CA, Husmann L, et al. First head-to-head comparison of effective radiation dose from low-dose 64-slice CT with prospective ECG-triggering versus invasive coronary angiography. *Heart* 2009; **95**(20): 1656-61.
  24. Herzog C, Nguyen SA, Savino G, et al. Does two-segment image reconstruction at 64-section CT coronary angiography improve image quality and diagnostic accuracy? *Radiology* 2007; **244**(1): 121-9.
  25. Herzog C, Zwerner PL, Doll JR, et al. Significant coronary artery stenosis: comparison on per-patient and per-vessel or per-segment basis at 64-section CT angiography. *Radiology* 2007; **244**(1): 112-20.
  26. Husmann L, Herzog BA, Burger IA, et al. Usefulness of additional coronary calcium scoring in low-dose CT coronary angiography with prospective ECG-triggering impact on total effective radiation dose and diagnostic accuracy. *Academic radiology* 2010; **17**(2): 201-6.
  27. Jakamy R, Barthelemy O, Le Feuvre C, et al. Accuracy of multislice computed tomography in the preoperative assessment of coronary disease in patients scheduled for heart valve surgery. *Archives of cardiovascular diseases* 2012; **105**(8-9): 424-31.
  28. Jenkins SM, Johnston N, Hawkins NM, et al. Limited clinical utility of CT coronary angiography in a district hospital setting. *QJM : monthly journal of the Association of Physicians* 2011; **104**(1): 49-57.
  29. Kajander S, Joutsiniemi E, Saraste M, et al. Cardiac positron emission tomography/computed tomography imaging accurately detects anatomically and functionally significant coronary artery disease. *Circulation* 2010; **122**(6): 603-13.
  30. Kefer J, Coche E, Legros G, et al. Head-to-head comparison of three-dimensional navigator-gated magnetic resonance imaging and 16-slice computed tomography to detect coronary artery stenosis in patients. *Journal of the American College of Cardiology* 2005; **46**(1): 92-100.
  31. Laissy JP, Messika-Zeitoun D, Serfaty JM, et al. Comprehensive evaluation of preoperative patients with aortic valve stenosis: usefulness of cardiac multidetector computed tomography. *Heart* 2007; **93**(9): 1121-5.
  32. Langer C, Peterschroder A, Franzke K, et al. Noninvasive coronary angiography focusing on calcification: multislice computed tomography compared with magnetic resonance imaging. *Journal of computer assisted tomography* 2009; **33**(2): 179-85.
  33. Leschka S, Alkadhi H, Plass A, et al. Accuracy of MSCT coronary angiography with 64-slice technology: first experience. *European heart journal* 2005; **26**(15): 1482-7.
  34. Leschka S, Scheffel H, Desbiolles L, et al. Combining dual-source computed tomography coronary angiography and calcium scoring: added value for the assessment of coronary artery disease. *Heart* 2008; **94**(9): 1154-61.
  35. Leschka S, Scheffel H, Husmann L, et al. Effect of decrease in heart rate variability on the diagnostic accuracy of 64-MDCT coronary angiography. *AJR American journal of roentgenology* 2008; **190**(6): 1583-90.
  36. Martuscelli E, Romagnoli A, D'Eliseo A, et al. Accuracy of thin-slice computed tomography in the detection of coronary stenoses. *European heart journal* 2004; **25**(12): 1043-8.
  37. Meijboom WB, Meijs MF, Schuijf JD, et al. Diagnostic accuracy of 64-slice computed tomography coronary angiography: a prospective, multicenter, multivendor study. *Journal of the American College of Cardiology* 2008; **52**(25): 2135-44.
  38. Meijboom WB, Mollet NR, Van Mieghem CA, et al. Pre-operative computed tomography coronary angiography to detect significant coronary artery disease in patients referred for cardiac valve surgery. *Journal of the American College of Cardiology* 2006; **48**(8): 1658-65.
  39. Meijboom WB, Mollet NR, Van Mieghem CA, et al. 64-Slice CT coronary angiography in patients with non-ST elevation acute coronary syndrome. *Heart* 2007; **93**(11): 1386-92.
  40. Meijboom WB, Weustink AC, Pugliese F, et al. Comparison of diagnostic accuracy of 64-slice computed tomography coronary angiography in women versus men with angina

- pectoris. *American Journal of Cardiology* 2007; **100**(10): 1532-7.
41. Mendoza V, Llerena L, Llerena L, Rodríguez L, Olivares E, Linares R. Ischemic heart disease diagnosed by 64 slice computed tomography coronary angiography. *The Internet Journal of Cardiology* 2009; **7**(1).
  42. Mollet NR, Cademartiri F, van Mieghem CA, et al. High-resolution spiral computed tomography coronary angiography in patients referred for diagnostic conventional coronary angiography. *Circulation* 2005; **112**(15): 2318-23.
  43. Nikolaou K, Knez A, Rist C, et al. Accuracy of 64-MDCT in the diagnosis of ischemic heart disease. *AJR American journal of roentgenology* 2006; **187**(1): 111-7.
  44. Nikolaou K, Rist C, Wintersperger BJ, et al. Clinical value of MDCT in the diagnosis of coronary artery disease in patients with a low pretest likelihood of significant disease. *AJR American journal of roentgenology* 2006; **186**(6): 1659-68.
  45. Ovrehus KA, Jensen JK, Mickley HF, et al. Comparison of usefulness of exercise testing versus coronary computed tomographic angiography for evaluation of patients suspected of having coronary artery disease. *The American journal of cardiology* 2010; **105**(6): 773-9.
  46. Ovrehus KA, Munkholm H, Bottcher M, Botker HE, Norgaard BL. Coronary computed tomographic angiography in patients suspected of coronary artery disease: impact of observer experience on diagnostic performance and interobserver reproducibility. *Journal of cardiovascular computed tomography* 2010; **4**(3): 186-94.
  47. Pontone G, Andreini D, Ballerini G, Nobili E, Pepi M. Diagnostic work-up of unselected patients with suspected coronary artery disease: complementary role of multidetector computed tomography, symptoms and electrocardiogram stress test. *Coronary artery disease* 2007; **18**(4): 265-74.
  48. Pontone G, Andreini D, Bartorelli AL, et al. Feasibility and accuracy of a comprehensive multidetector computed tomography acquisition for patients referred for balloon-expandable transcatheter aortic valve implantation. *American heart journal* 2011; **161**(6): 1106-13.
  49. Pontone G, Andreini D, Bartorelli AL, et al. Diagnostic accuracy of coronary computed tomography angiography: a comparison between prospective and retrospective electrocardiogram triggering. *Journal of the American College of Cardiology* 2009; **54**(4): 346-55.
  50. Pontone G, Andreini D, Quaglia C, Ballerini G, Nobili E, Pepi M. Accuracy of multidetector spiral computed tomography in detecting significant coronary stenosis in patient populations with differing pre-test probabilities of disease. *Clinical radiology* 2007; **62**(10): 978-85.
  51. Pouleur AC, le Polain de Waroux JB, Kefer J, et al. Usefulness of 40-slice multidetector row computed tomography to detect coronary disease in patients prior to cardiac valve surgery. *European radiology* 2007; **17**(12): 3199-207.
  52. Pouleur AC, le Polain de Waroux JB, Kefer J, Pasquet A, Vanoverschelde JL, Gerber BL. Direct comparison of whole-heart navigator-gated magnetic resonance coronary angiography and 40- and 64-slice multidetector row computed tomography to detect the coronary artery stenosis in patients scheduled for conventional coronary angiography. *Circulation Cardiovascular imaging* 2008; **1**(2): 114-21.
  53. Pugliese F, Mollet NR, Runza G, et al. Diagnostic accuracy of non-invasive 64-slice CT coronary angiography in patients with stable angina pectoris. *European radiology* 2006; **16**(3): 575-82.
  54. Rixe J, Rolf A, Conradi G, et al. Detection of relevant coronary artery disease using dual-source computed tomography in a high probability patient series: comparison with invasive angiography. *Circulation journal : official journal of the Japanese Circulation Society* 2009; **73**(2): 316-22.
  55. Rochitte CE, George RT, Chen MY, et al. Computed tomography angiography and perfusion to assess coronary artery stenosis causing perfusion defects by single photon emission computed tomography: the CORE320 study. *European heart journal* 2014; **35**(17): 1120-30.
  56. Sato A, Nozato T, Hikita H, et al. Incremental value of combining 64-slice computed tomography angiography with stress nuclear myocardial perfusion imaging to improve noninvasive detection of coronary artery disease. *Journal of nuclear cardiology : official publication of the*

*American Society of Nuclear Cardiology* 2010; **17**(1): 19-26.

57. Scheffel H, Alkadhi H, Plass A, et al. Accuracy of dual-source CT coronary angiography: First experience in a high pre-test probability population without heart rate control. *European radiology* 2006; **16**(12): 2739-47.

58. Shabestari AA, Abdi S, Akhlaghpour S, et al. Diagnostic performance of 64-channel multislice computed tomography in assessment of significant coronary artery disease in symptomatic subjects. *The American journal of cardiology* 2007; **99**(12): 1656-61.

59. Sun K, Han RJ, Cui LF, et al. Feasibility and Diagnostic Accuracy for Assessment of Coronary Artery Stenosis of Prospectively Electrocardiogram-gated High-pitch Spiral Acquisition Mode Dual-source CT Coronary Angiography in Patients with Relatively Higher Heart Rates: in Comparison with Catheter Coronary Angiography. *Chinese medical sciences journal = Chung-kuo i hsueh k'o hsueh tsa chih* 2013; **27**(4): 213-9.

60. Ugolini P, Pressacco J, Lesperance J, et al. Evaluation of coronary atheroma by 64-slice multidetector computed tomography: Comparison with intravascular ultrasound and angiography. *The Canadian journal of cardiology* 2009; **25**(11): 641-7.

61. Watkins MW, Hesse B, Green CE, et al. Detection of coronary artery stenosis using 40-channel computed tomography with multi-segment reconstruction. *The American journal of cardiology* 2007; **99**(2): 175-81.

62. Xu L, Yang L, Fan Z, Yu W, Lv B, Zhang Z. Diagnostic performance of 320-detector CT coronary angiography in patients with atrial fibrillation: preliminary results. *European radiology* 2011; **21**(5): 936-43.

63. Yang L, Zhang Z, Fan Z, et al. 64-MDCT coronary angiography of patients with atrial fibrillation: influence of heart rate on image quality and efficacy in evaluation of coronary artery disease. *AJR American journal of roentgenology* 2009; **193**(3): 795-801.

64. Unpublished study #1.

65. Unpublished study #2.

**Supplementary table 18**

| <b>Studies without core labs</b> |                                 | <b>Studies with core labs</b>   |                                 |
|----------------------------------|---------------------------------|---------------------------------|---------------------------------|
| <b>Sensitivity<br/>(95% CI)</b>  | <b>Specificity<br/>(95% CI)</b> | <b>Sensitivity<br/>(95% CI)</b> | <b>Specificity<br/>(95% CI)</b> |
| 95.2<br>(92.5 to 96.9)           | 80.8<br>(76.7 to 84.3)          | 73.9<br>(39.4 to 92.5)          | 61.7<br>(40.9 to 78.9)          |

**Supplementary figure 1 | Proportion of studies with low, high or unclear risk of bias in QUADAS-2**

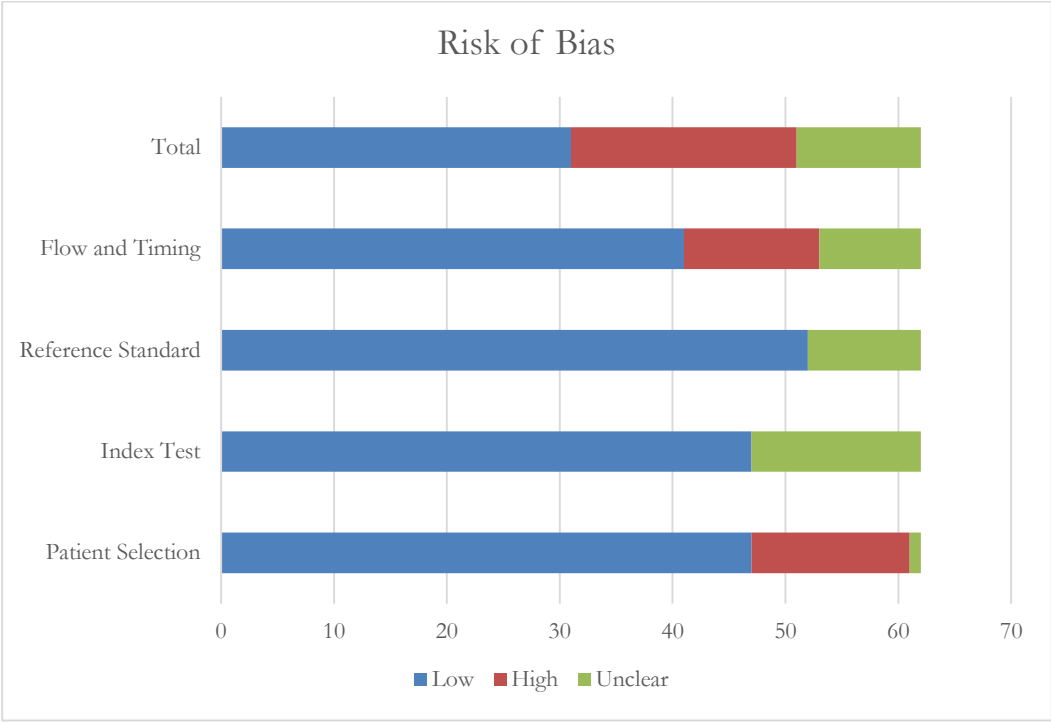

The X-axis displays the proportional rate of studies (in %) bearing a low (blue), high (red) or unclear (green) risk of bias regarding the items displayed on the Y-axis. In general, the risk of bias was low, especially regarding the both diagnostic tests, while it was highest in patient selection.

**Supplementary figure 2 | Proportion of studies with low, high or unclear concerns regarding applicability in QUADAS-2**

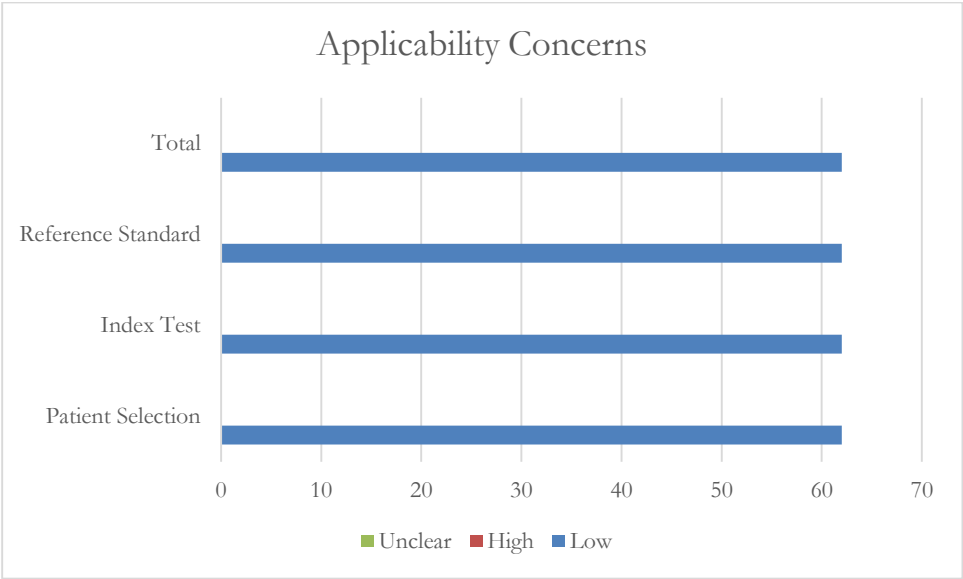

The X-axis displays the proportional rate of studies (in %) bearing a low (blue), high (red) or unclear (green) risk of bias regarding the items displayed on the Y-axis. There are only low concerns regarding the applicability of studies included in the analysis.

Supplementary figure 3 | Clinical diagnostic performance of CTA as a function of pretest probability excluding non-diagnostic examinations

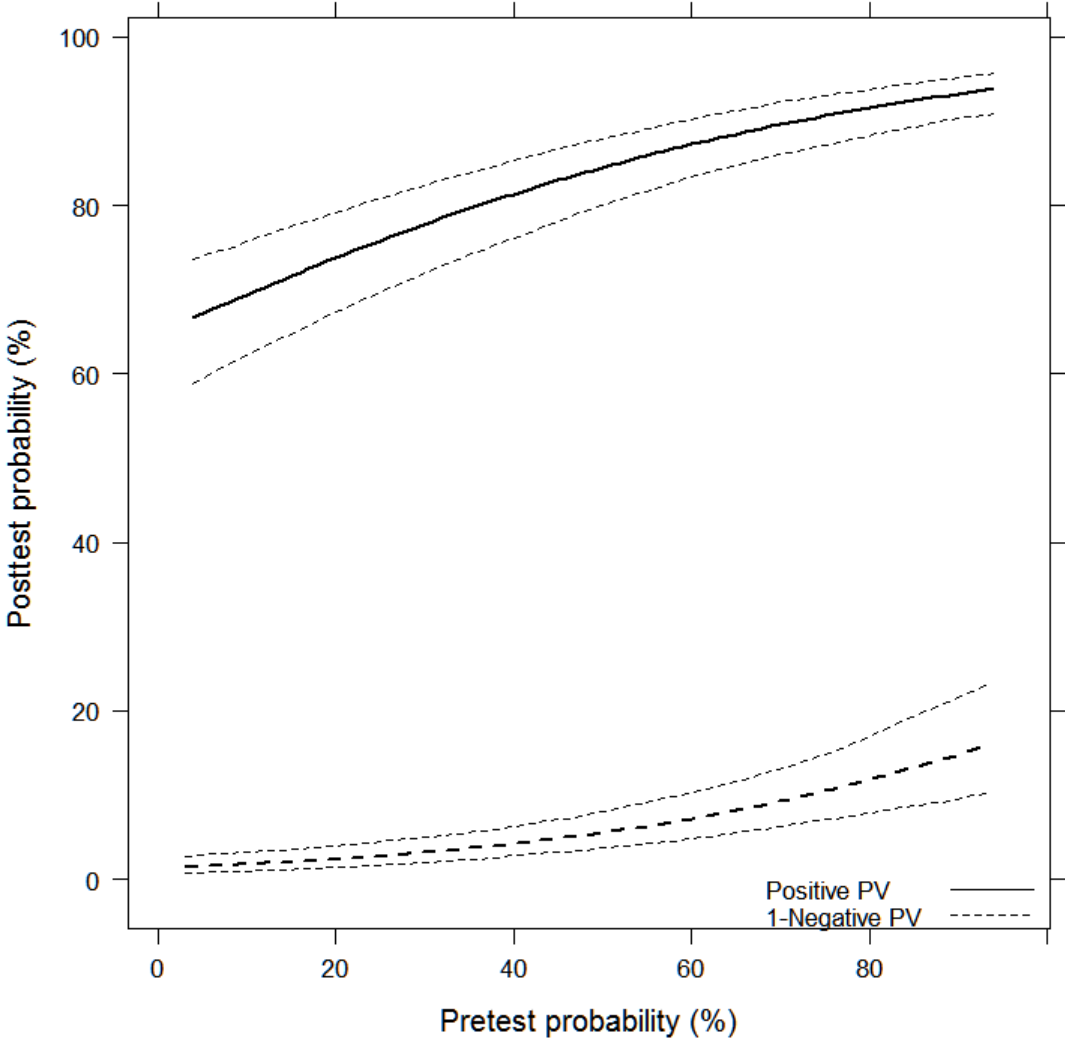

The X-axis represents the predicted clinical pretest probability and the Y-axis shows the positive predictive value (PV) and 1-Negative PV with their 95% CI based on the generalised linear mixed model excluding non-diagnostic CTA examinations. Disease probabilities were predicted by averaging over the random-effects distribution.

Supplementary figure 4 | Heart rate during CTA in female and male patients

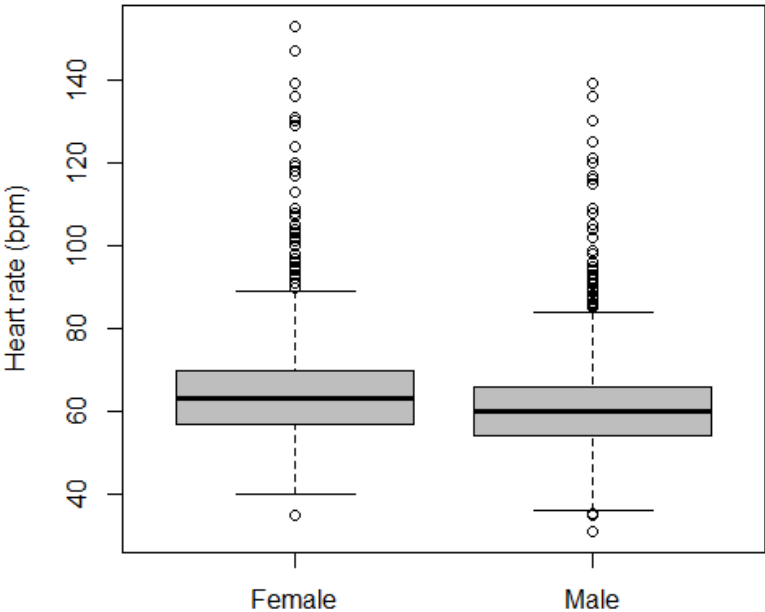

Median heart rate was significantly higher in females during CTA (63 beats per minute [bpm], IQR: 57-70) compared with males (60 bpm, IQR: 54-66, MWM test:  $W = 3504600$ ,  $p < 0.001$ ). Data on heart rate were missing for 62 of 1859 females and 151 of 3473 males.



Supplementary figure 5 | Coronary calcium score in patients with up to 75 years of age vs older patients

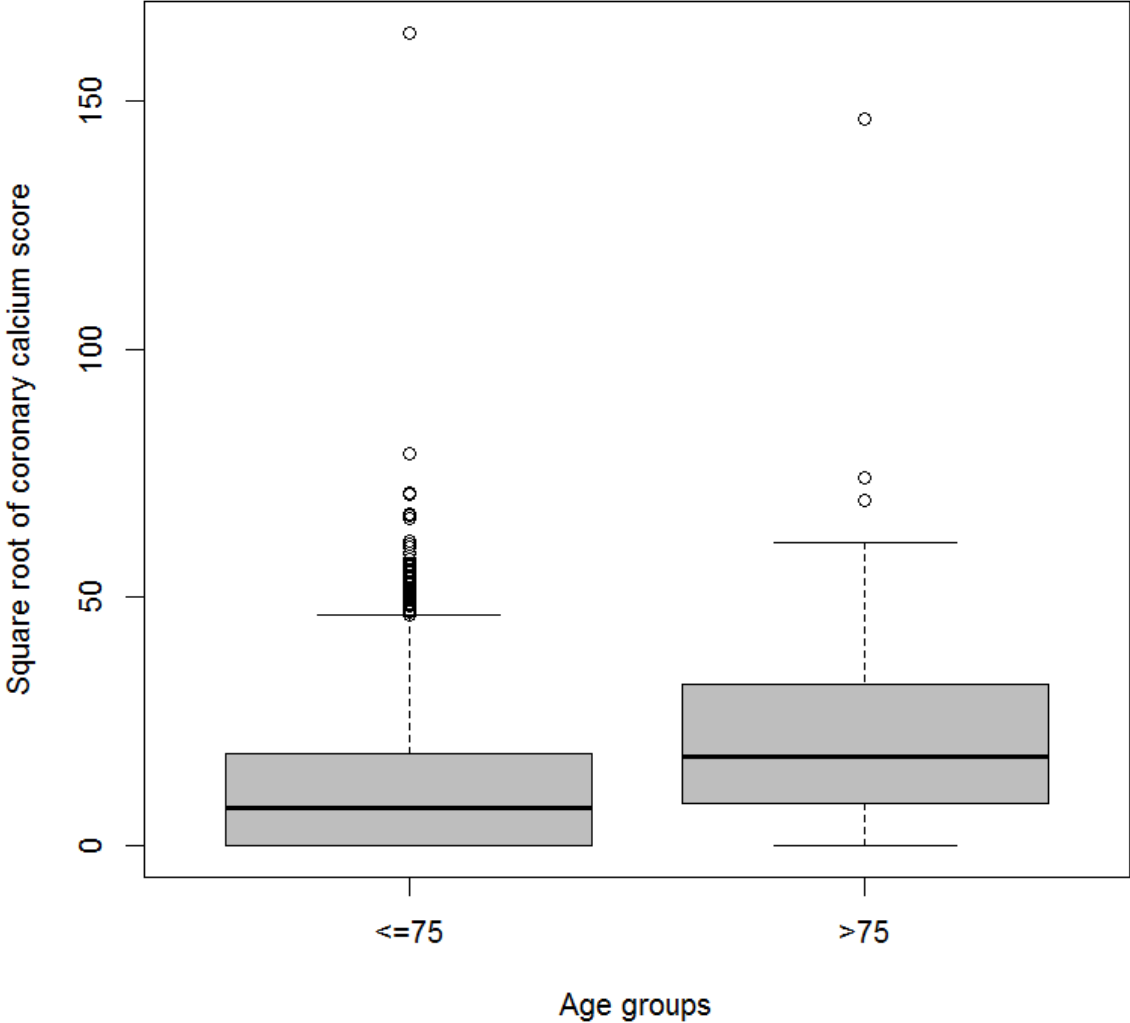

Median calcium score (square root transformed) was significantly higher in patients above 75 years of age (17.916, IQR: 8.367-32.348) compared with younger patients (7.483, IQR: 0.000-13.74,  $p < 0.001$ ). Data on calcium score were missing for 311 of 552 patients above 75 years of age and 2567 of 4780 younger patients. The boxplot shows square root-transformed data of coronary calcium scores because of skewness of data.

| Square root transformed data |       |                     |        |        |                     |         |      |
|------------------------------|-------|---------------------|--------|--------|---------------------|---------|------|
| Groups                       | Min   | 1 <sup>st</sup> Qu. | Median | Mean   | 3 <sup>rd</sup> Qu. | Max     | NA's |
| Age ≤75y                     | 0.000 | 0.000               | 7.483  | 11.928 | 13.574              | 163.677 | 2567 |
| Age >75y                     | 0.000 | 8.367               | 17.916 | 21.916 | 32.348              | 146.595 | 311  |

**Supplementary figure 6 | Receiver operating characteristic curves for CTA by subgroup excluding non-diagnostic CT examinations**

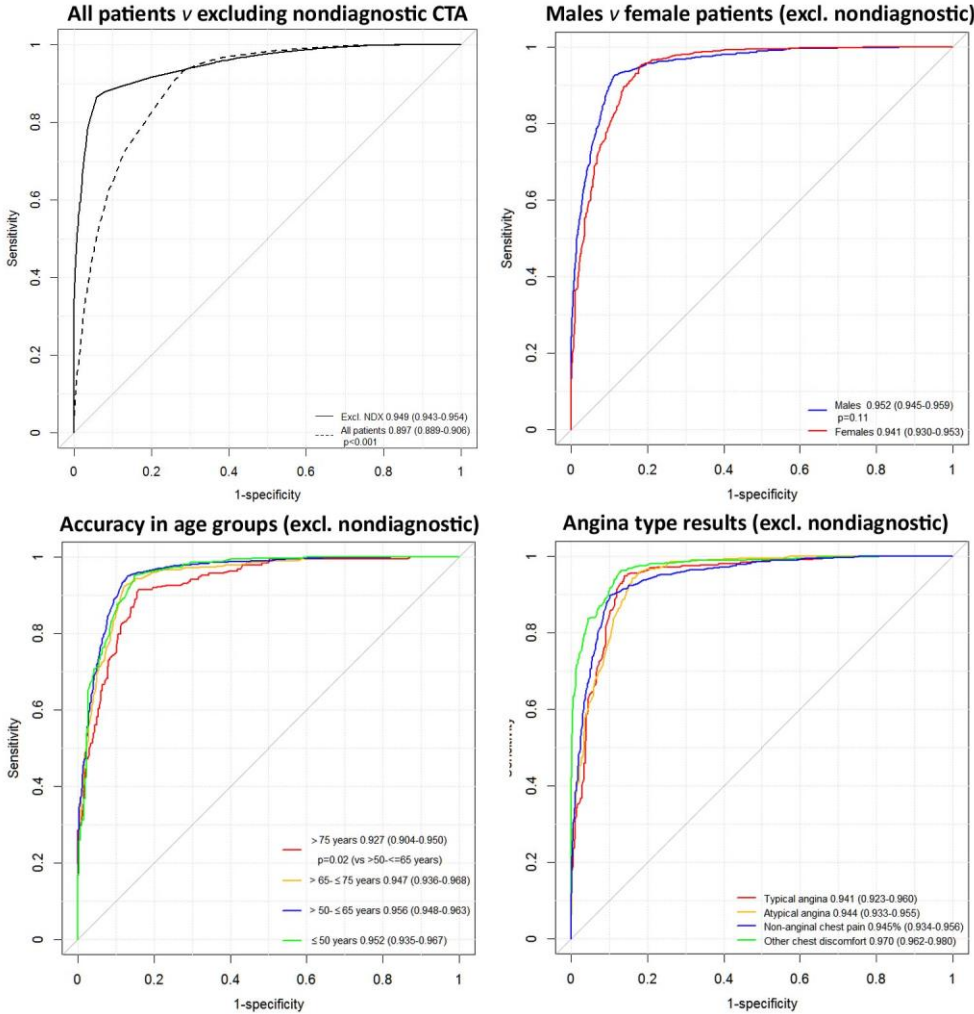

Subgroup comparisons in the three panels are provided for all patients after exclusion of non-diagnostic CT examinations. In the upper left panel diagnostic performance results are shown for all patients in comparison to results obtained after exclusion of non-diagnostic (NDX) test results like also demonstrated in the manuscript. Considering all patients resulted in lower performance, which is a more accurate prediction of the real-world performance to be expected. In contrast to the manuscript subgroup comparisons in the other three panels here are provided for patients after exclusion of non-diagnostic CT examinations: diagnostic performance is now similar in females and males. The other comparisons revealed similar results as when including non-diagnostic CT examinations: CTA’s accuracy was lower in patients older than 75, and angina pectoris types were not significantly associated with performance. Like in the manuscript curves were generated using a generalised linear mixed model and predictions based on these models. Computations were performed with the statistical package R and the packages lme4 and pROC. AUC were constructed using the observed data and model-based predictions, which also included the random effects reflecting variability between studies and unobserved influential variables.

Supplementary figure 6-7 | Publication bias analysis using Funnel plot

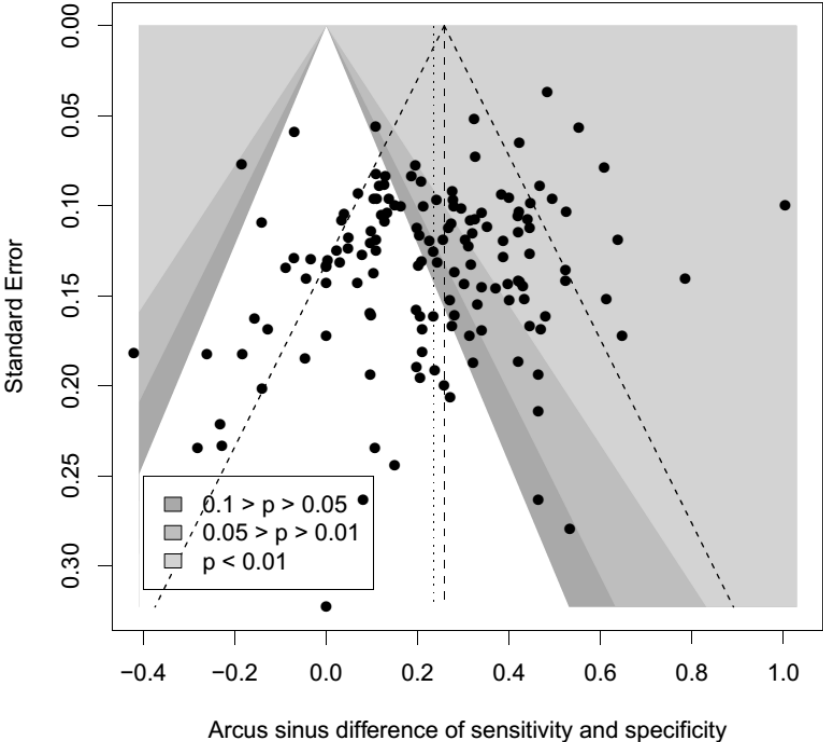

This funnel plot shows the arc sinus difference of sensitivity and specificity *vs.* the corresponding standard error. The corresponding statistical test was performed using the method proposed by Rücker with a rank test: Kendall's tau = -661 s.e. = 584.973,  $z = -1.13$ ,  $p = 0.2585$ . There was no sign of publication bias.

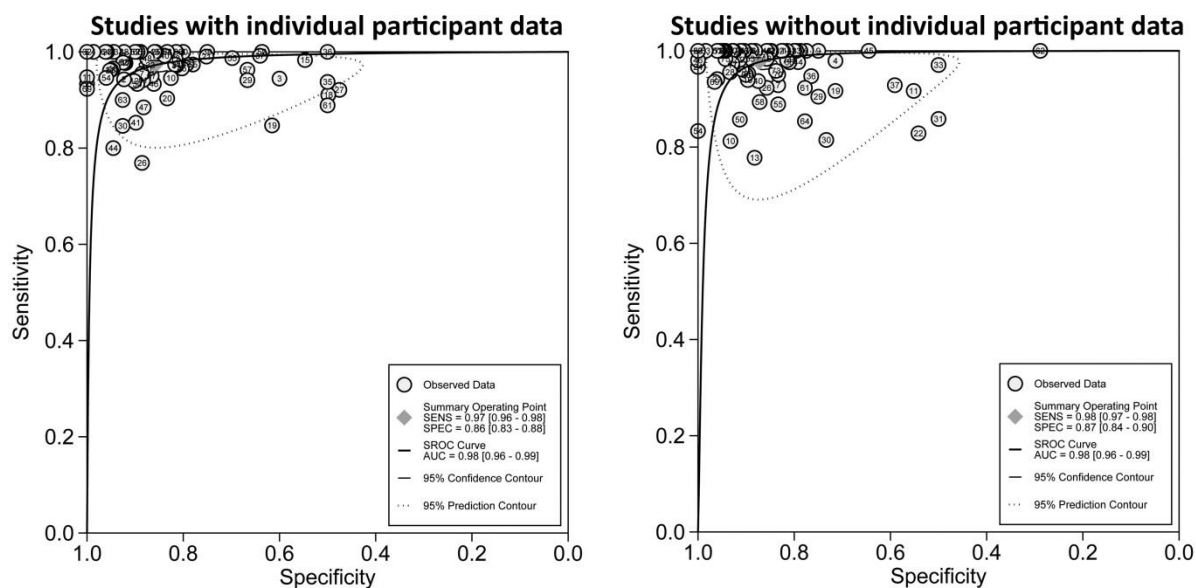

**Supplementary figure 87 | Summary receiver operating characteristic curves for CTA studies with and without individual participant data available**

Curves are shown for studies with individual participant data (IPD) available in comparison to studies for which no IPD were available. Curves were calculated using aggregated data methodology (summary receiver operating characteristic curves) both for panels and after excluding non-diagnostic test results, which were not consistently available in publications of studies which did not provide individual participant data. Among the 76 studies which provided individual participant data, aggregate data were not available for seven studies, two of them unpublished, leaving 69 for the analysis of studies with IPD, while 76 of the 78 studies which did not provide IPD had aggregate data available (see figure 1 of main paper). There was no significant difference in diagnostic performance between these two groups of diagnostic accuracy studies ( $P=0.73$ ). Further details are shown in table 4 of main paper.

### **Supplementary PRISMA item 1 | PICOS**

|                            |                                                                                                                                                                          |
|----------------------------|--------------------------------------------------------------------------------------------------------------------------------------------------------------------------|
| <u>Patients:</u>           | Patients with stable chest discomfort and a clinical indication to undergo invasive coronary angiography                                                                 |
| <u>Intervention:</u>       | Coronary computed tomography angiography                                                                                                                                 |
| <u>Comparison/Control:</u> | Invasive coronary angiography                                                                                                                                            |
| <u>Outcomes:</u>           | Diagnostic accuracy as defined by positive and negative predictive values as a function of pretest probability and sensitivity and specificity                           |
| <u>Setting:</u>            | Individual participant meta-analysis of diagnostic accuracy studies comparing coronary computed tomography angiography with invasive coronary as the reference standard. |

### **Supplementary PRISMA items 2 | Search strategy for searching PubMed via Medline**

("tomography, x-ray computed"[MeSH Terms])OR ("computed tomography"[Text Words])OR ("CT"[Text Words])OR ("multidetector"[Text Words])OR ("multi-detector"[Text Words])OR ("multi detector"[Text Words])OR ("MDCT"[Text Words])OR ("multislice"[Text Words])OR ("multi-slice"[Text Words])OR ("MSCT"[Text Words])OR ("dual-source"[Text Words])OR ("dual source"[Text Words]) OR ("DSCT"[Text Words])OR ("multi-row"[Text Words])OR ("multi row"[Text Words]))AND(("coronary angiography"[Mesh Terms])OR ("coronary angiography"[Text Words]))AND(("coronary disease"[Mesh Terms])OR ("coronary artery disease"[Mesh Terms])OR ("coronary stenosis"[Mesh Terms])OR ("coronary disease"[Text Words])OR ("coronary artery disease"[Text Words])OR ("coronary stenosis"[Text Words])OR ("CAD"[Text Words])OR ("coronary heart disease"[Text Words])OR ("CHD"[Text Words]))

Further details have been reported in the study protocol.

### **Supplementary PRISMA items 3 | Data items and IPD collection file**

Data items were predefined and collected using an IPD collection in a Microsoft Excel format that was sent to all corresponding authors of identified eligible diagnostic accuracy studies. Data items consisted of all data necessary to estimate patients' pretest probability (age, gender, angina pectoris classification), 3x2 cross tabulations (test positive, negative or non-diagnostic for both, coronary computed tomography angiography and invasive coronary angiography), details of each CT scan (number of detector rows, heart rate during scan) and patient information on cardiac medical history (stents or bypasses received, risk factors, stress tests performed). Please find the IPD collection file for all collected data items in Appendix C.

### **Supplementary PRISMA items 4 | Data revision process**

Data harmonisation was performed by two independent readers who analysed data and searched for non-plausible data, including range checks, wrong entries, non-logical values and date checks etc. The two readers also recalculated 2x2 and/or 3x2 cross tabulations and compared these with the published data if possible and if available, non-diagnostic examinations were also recorded. After consensus the data management team solved contradictions. If not possible, new Excel files were created for the missing data and again sent to the corresponding author with comments on implausible data and the request to check. For any remaining implausibilities, further reminder mails were sent. Most revisions had to be done on angina type classification (dual or missing entries, rare cases of other classification), missing values for heart rate during CT, 3x2 cross tabulations (due to another definition of non-diagnostic examinations), missing values of CT characteristics, and typing errors.
