# Supplementary material for: Diagnosis of obstructive coronary artery disease using computed tomography angiography in patients with stable chest pain depending on clinical probability and in clinically important subgroups: meta-analysis of individual patient data
Source: PubMed Central journal article supplement (PMC6561308; doi:10.1136/bmj.l1945), 2019-06-12
Supplement: haar046861.ww3.pdf [file haar046861.ww3.pdf]

Please use 0=no, 1=yes if not otherwise indicated

| Comments and Explanations                                                                                                         | Female=0<br>Male=1 | Typical Angina Pectoris                                                      |                                                      | Atypical Angina Pectoris                             |                                                      | Non-anginal Chest Pain | Other Chest Discomfort | Pain Unknown | Average heart rate during scanning | CT | Coronary Artery Stenosis                                              |                                                             |                                                                                       | Comment on Nondiagnostic | CATH | Coronary Artery Stenosis                                                                        |                                                                       |                                                             | Comment on Nondiagnostic | Additional CT Characteristics | DLP (mGy*cm) | mSv | Retrospective (+0) or Prospective (+1) Scanning | Number of Detector Rows Used | Oral Beta Blockade as Part of the CT Protocol | Type of Oral Beta Blocker | Dose of Oral Beta Blocker (mg) | IV Beta Blockade | Type of IV Beta Blocker | Dose of IV Beta Blocker (mg) | Sublingual Nitroglycerin | Dose of Sublingual Nitroglycerin (mg) |
|-----------------------------------------------------------------------------------------------------------------------------------|--------------------|------------------------------------------------------------------------------|------------------------------------------------------|------------------------------------------------------|------------------------------------------------------|------------------------|------------------------|--------------|------------------------------------|----|-----------------------------------------------------------------------|-------------------------------------------------------------|---------------------------------------------------------------------------------------|--------------------------|------|-------------------------------------------------------------------------------------------------|-----------------------------------------------------------------------|-------------------------------------------------------------|--------------------------|-------------------------------|--------------|-----|-------------------------------------------------|------------------------------|-----------------------------------------------|---------------------------|--------------------------------|------------------|-------------------------|------------------------------|--------------------------|---------------------------------------|
|                                                                                                                                   |                    | Factor=1<br>getting worse when exercising and 3. Criteria for Typical Angina | Factor=2<br>out of the 3 criteria for Typical Angina | Factor=1<br>out of the 3 Criteria for Typical Angina | Factor=2<br>out of the 3 Criteria for Typical Angina |                        |                        |              |                                    |    | At least one coronary artery with at least one 50% diameter stenosis. | No coronary artery with at least one 50% diameter stenosis. | Nondiagnostic: if no stenosis is seen and at least one vessel is not fully evaluable. |                          |      | Please give reason why a patient was nondiagnostic, e.g. motion artifact, too much calcium etc. | At least one coronary artery with at least one 50% diameter stenosis. | No coronary artery with at least one 50% diameter stenosis. |                          |                               |              |     |                                                 |                              |                                               |                           |                                |                  |                         |                              |                          |                                       |
| Patient No. Example (57 years, male, true positive in CT with atypical angina. Please start your patients on the following line.) | 07.03.1945         | 14.03.2001                                                                   | 1                                                    | 0                                                    | 1                                                    | 0                      | 0                      | 0            | 55                                 | 1  | 0                                                                     | 0                                                           |                                                                                       |                          | 1    | 0                                                                                               | 0                                                                     |                                                             |                          |                               | 5            | 0   | 12                                              | 1                            | Atenolol                                      | 150                       | 1                              | Esamolol         | 200                     | 1                            | 1.2                      |                                       |

The following information is nice to have, and everyone contributing will be an author on the resulting article. Study that this is not a must for the primary analysis. Please provide the available information.

Please provide DLP or rDv

| Contrast Agent Amount (ml) | Type of Contrast Agent | Contrast Agent Flow (ml/s) | Contrast Agent Concentration (Iodine mg/ml) | Breathhold Duration (s) | Additional CATH Characteristics | CATH after or before CT? | Days between CT and CATH | Additional Patient Characteristics | Weight (kg) | Height (cm) | BMI | Unstable Angina | Coronary Stents Present | Coronary Bypasses Present | Hypertension | Diabetes | Hyperlipidemia | Current Smoker | Former Smoker | Positive Family History | Prior Myocardial Infarction | Additional Tests Characteristics | Rest ECG Done | Rest ECG: ST Changes | Rest ECG: Q waves | Stress ECG Done | Stress ECG: Significant ST Changes | Stress Echo Done | Stress Echo: Significant Signs of Ischemia | Stress SPECT: Significant Signs of Ischemia |   |
|----------------------------|------------------------|----------------------------|---------------------------------------------|-------------------------|---------------------------------|--------------------------|--------------------------|------------------------------------|-------------|-------------|-----|-----------------|-------------------------|---------------------------|--------------|----------|----------------|----------------|---------------|-------------------------|-----------------------------|----------------------------------|---------------|----------------------|-------------------|-----------------|------------------------------------|------------------|--------------------------------------------|---------------------------------------------|---|
| 80                         | Iodixanol              | 5                          | 320                                         | 8                       |                                 | 0                        | 1                        |                                    | 85          | 174         | 28  | 0               | 0                       | 0                         | 1            | 0        | 1              | 0              | 0             | 1                       | 1                           | 1                                | 1             | 1                    | 1                 | 1               | 1                                  | 0                | 0                                          | 0                                           | 0 |

The following information is nice to have, and everyone contributing will be an author on the resulting ancillary study but this is not a must for the primary analysis. Please provide the available information.

The following information is nice to have, and everyone contributing will be an author on the resulting ACC/AHA study but this is not a must for the primary analysis. Please provide the available information.

year? If was angina (CCS III) within the last week, severe myocardial infarction (at least CCS III) that started in the last 2 months), or increasing angina (increased by at least 1 CCS class to CCS III in the last 2 months).

The following information is nice to have, and everyone contributing will be an author on the resulting ACC/AHA study but this is not a must for the primary analysis. Please provide the available information.
